# Supplementary material for: Diagnostic biomarkers for adult haemophagocytic lymphohistiocytosis in critically ill patients (HEMICU): a prospective observational study protocol
Source: PubMed Central journal article supplement — BMJ Open. 2019 Oct 30;9(10):e032695. doi: 10.1136/bmjopen-2019-032695 (PMC6830715; doi:10.1136/bmjopen-2019-032695), 2019-10-30
Supplement: bmjopen-2019-032695.draft_revisions.pdf [file bmjopen-2019-032695.draft_revisions.pdf]

# BMJ Open

BMJ Open is committed to open peer review. As part of this commitment we make the peer review history of every article we publish publicly available.

When an article is published we post the peer reviewers' comments and the authors' responses online. We also post the versions of the paper that were used during peer review. These are the versions that the peer review comments apply to.

The versions of the paper that follow are the versions that were submitted during the peer review process. They are not the versions of record or the final published versions. They should not be cited or distributed as the published version of this manuscript.

BMJ Open is an open access journal and the full, final, typeset and author-corrected version of record of the manuscript is available on our site with no access controls, subscription charges or pay-per-view fees (<http://bmjopen.bmj.com>).

If you have any questions on BMJ Open's open peer review process please email [info.bmjopen@bmj.com](mailto:info.bmjopen@bmj.com)

# BMJ Open

## Study protocol: Diagnostic Biomarkers for Adult Hemophagocytic Lymphohistiocytosis in Critically Ill Patients (HEMICU)

|                               |                                                                                                                                                                                                                                                                                                                                                                                                                                                                                                                                                                                                                                                                                                                                                                                                                                                                                                                                                                                                                                                                                                                                                                                                                                                                                                                                                                                                                                                                                                                                                                                                                                                                                                                                                                                                                                                                                                                                                                                                                                                                                                                                                                                                                                                                                                       |
|-------------------------------|-------------------------------------------------------------------------------------------------------------------------------------------------------------------------------------------------------------------------------------------------------------------------------------------------------------------------------------------------------------------------------------------------------------------------------------------------------------------------------------------------------------------------------------------------------------------------------------------------------------------------------------------------------------------------------------------------------------------------------------------------------------------------------------------------------------------------------------------------------------------------------------------------------------------------------------------------------------------------------------------------------------------------------------------------------------------------------------------------------------------------------------------------------------------------------------------------------------------------------------------------------------------------------------------------------------------------------------------------------------------------------------------------------------------------------------------------------------------------------------------------------------------------------------------------------------------------------------------------------------------------------------------------------------------------------------------------------------------------------------------------------------------------------------------------------------------------------------------------------------------------------------------------------------------------------------------------------------------------------------------------------------------------------------------------------------------------------------------------------------------------------------------------------------------------------------------------------------------------------------------------------------------------------------------------------|
| Journal:                      | <i>BMJ Open</i>                                                                                                                                                                                                                                                                                                                                                                                                                                                                                                                                                                                                                                                                                                                                                                                                                                                                                                                                                                                                                                                                                                                                                                                                                                                                                                                                                                                                                                                                                                                                                                                                                                                                                                                                                                                                                                                                                                                                                                                                                                                                                                                                                                                                                                                                                       |
| Manuscript ID                 | bmjopen-2019-032695                                                                                                                                                                                                                                                                                                                                                                                                                                                                                                                                                                                                                                                                                                                                                                                                                                                                                                                                                                                                                                                                                                                                                                                                                                                                                                                                                                                                                                                                                                                                                                                                                                                                                                                                                                                                                                                                                                                                                                                                                                                                                                                                                                                                                                                                                   |
| Article Type:                 | Protocol                                                                                                                                                                                                                                                                                                                                                                                                                                                                                                                                                                                                                                                                                                                                                                                                                                                                                                                                                                                                                                                                                                                                                                                                                                                                                                                                                                                                                                                                                                                                                                                                                                                                                                                                                                                                                                                                                                                                                                                                                                                                                                                                                                                                                                                                                              |
| Date Submitted by the Author: | 01-Jul-2019                                                                                                                                                                                                                                                                                                                                                                                                                                                                                                                                                                                                                                                                                                                                                                                                                                                                                                                                                                                                                                                                                                                                                                                                                                                                                                                                                                                                                                                                                                                                                                                                                                                                                                                                                                                                                                                                                                                                                                                                                                                                                                                                                                                                                                                                                           |
| Complete List of Authors:     | <p>Lachmann, Gunnar; Charité Universitätsmedizin Berlin, Department of Anesthesiology and Operative Intensive Care Medicine<br/> Knaak, Cornelia; Charité Universitätsmedizin Berlin, Department of Anesthesiology and Operative Intensive Care Medicine<br/> von Haefen, Clarissa; Charité Universitätsmedizin Berlin, Department of Anesthesiology and Operative Intensive Care Medicine<br/> Paeschke, Nadine; Charité Universitätsmedizin Berlin, Department of Anesthesiology and Operative Intensive Care Medicine<br/> Meisel, Christian; Labor Berlin - Charité Vivantes GmbH, Department of Immunology<br/> Nyvlt, Peter; Charité Universitätsmedizin Berlin, Department of Anesthesiology and Operative Intensive Care Medicine<br/> Schuster, Friederike; Charité Universitätsmedizin Berlin, Department of Anesthesiology and Operative Intensive Care Medicine<br/> Piper, Sophie; Charité Universitätsmedizin Berlin, Institute of Biometry and Clinical Epidemiology<br/> Kruppa, Jochen; Charité - Universitätsmedizin Berlin, corporate member of Freie Universität Berlin, Humboldt-Universität zu Berlin and Berlin Institute of Health, Berlin, Germany , Institute of Biometry and Clinical Epidemiology<br/> Vorderwülbecke, Gerald; Charité Universitätsmedizin Berlin, Department of Anesthesiology and Operative Intensive Care Medicine<br/> Balzer, Felix; Charité Universitätsmedizin Berlin, Department of Anesthesiology and Operative Intensive Care Medicine<br/> La Roseé, Paul; Schwarzwald-Baar Klinikum Villingen-Schwenningen GmbH, Klinik für Innere Medizin II<br/> Schenk, Thomas; Universitätsklinikum Jena, Department of Hematology and Oncology<br/> Unterwalder, Nadine; Labor Berlin - Charité Vivantes GmbH, Department of Immunology<br/> Kölsch, Uwe; Labor Berlin - Charité Vivantes GmbH, Department of Immunology<br/> Lachmann, Nils; Charité Universitätsmedizin Berlin, Institute for Transfusion Medicine, H&amp;I Laboratory<br/> Akyüz, Levent; Charité Universitätsmedizin Berlin, Institute for Medical Immunology<br/> Brunkhorst, Frank; Universitätsklinikum Jena, Center for Clinical Studies, Department of Anesthesiology and Intensive Care Medicine<br/> Volk, Hans-Dieter; Charité Universitätsmedizin Berlin, Institute for</p> |

1  
2  
3  
4  
5  
6  
7  
8  
9  
10  
11  
12  
13  
14  
15  
16  
17  
18  
19  
20  
21  
22  
23  
24  
25  
26  
27  
28  
29  
30  
31  
32  
33  
34  
35  
36  
37  
38  
39  
40  
41  
42  
43  
44  
45  
46  
47  
48  
49  
50  
51  
52  
53  
54  
55  
56  
57  
58  
59  
60

|           |                                                                                                                                                                                                                       |
|-----------|-----------------------------------------------------------------------------------------------------------------------------------------------------------------------------------------------------------------------|
|           | Medical Immunology<br>Keh, Didier; Charité Universitätsmedizin Berlin, Department of<br>Anesthesiology and Operative Intensive Care Medicine<br>Spies, Claudia; Charité, Universitaetsmedizin Berlin, Anaesthesiology |
| Keywords: | Hemophagocytic Lymphohistiocytosis (HLH), Hemophagocytic syndrome (HS), Macrophage activation syndrome (MAS), Sepsis, biomarker, intensive care unit (ICU)                                                            |
|           |                                                                                                                                                                                                                       |

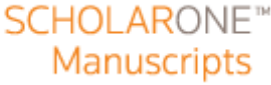

# Study protocol: Diagnostic Biomarkers for Adult Hemophagocytic Lymphohistiocytosis in Critically Ill Patients (HEMICU)

**Gunnar Lachmann<sup>1,2</sup>, Cornelia Knaak<sup>1</sup>, Clarissa von Haefen<sup>1</sup>, Nadine Paeschke<sup>1</sup>,  
Christian Meisel<sup>3</sup>, Peter Nyvlt<sup>1</sup>, Friederike S. Schuster<sup>1</sup>, Sophie K. Piper<sup>2,4</sup>,  
Jochen Kruppa<sup>2,4</sup>, Gerald Vorderwülbecke<sup>1</sup>, Felix Balzer<sup>1</sup>, Paul La Roseé<sup>5</sup>,  
Thomas Schenk<sup>6</sup>, Nadine Unterwalder<sup>3</sup>, Uwe Kölsch<sup>3</sup>, Nils Lachmann<sup>7</sup>, Levent  
Akyüz<sup>8</sup>, Frank M. Brunkhorst<sup>9</sup>, Hans-Dieter Volk<sup>8</sup>, Didier Keh<sup>1</sup>, Claudia Spies<sup>1</sup>**

<sup>1</sup>Department of Anesthesiology and Operative Intensive Care Medicine (CCM, CVK),  
Charité – Universitätsmedizin Berlin, corporate member of Freie Universität Berlin,  
Humboldt-Universität zu Berlin, and Berlin Institute of Health, Augustenburger Platz  
1, D-13353 Berlin, Germany

<sup>2</sup>Berlin Institute of Health (BIH), Anna-Louisa-Karsch-Str. 2, D-10178 Berlin,  
Germany

<sup>3</sup>Department of Immunology, Labor Berlin - Charité Vivantes GmbH, Sylter Strasse 2,  
13353 Berlin

<sup>4</sup>Institute of Biometry and Clinical Epidemiology, Charité – Universitätsmedizin Berlin,  
corporate member of Freie Universität Berlin, Humboldt-Universität zu Berlin, and  
Berlin Institute of Health, Charitéplatz 1, D-10117 Berlin, Germany

<sup>5</sup>Klinik für Innere Medizin II, Schwarzwald-Baar-Klinikum, Klinikstraße 11, D-78052  
Villingen-Schwenningen, Germany

<sup>6</sup>Department of Hematology and Oncology, Universitätsklinikum Jena,  
Am Klinikum 1, D-07747 Jena, Germany

1  
2  
3 <sup>7</sup>Institute for Transfusion Medicine, H&I Laboratory, Charité – Universitätsmedizin  
4 Berlin, Corporate Member of Freie Universität Berlin, Humboldt-Universität zu Berlin,  
5 and Berlin Institute of Health, Augustenburger Platz 1, D-13353 Berlin, Germany  
6  
7

8  
9 <sup>8</sup>Institute for Medical Immunology, Charité – Universitätsmedizin Berlin, Corporate  
10 Member of Freie Universität Berlin, Humboldt-Universität zu Berlin, and Berlin  
11 Institute of Health, Augustenburger Platz 1, D-13353 Berlin, Germany  
12  
13

14  
15 <sup>9</sup>Center for Clinical Studies, Department of Anesthesiology and Intensive Care  
16 Medicine, Universitätsklinikum Jena, Salvador-Allende-Platz 27, D-07747 Jena,  
17 Germany  
18  
19

20  
21  
22  
23 Corresponding Author:

24 Dr. med. Gunnar Lachmann

25  
26 Department of Anesthesiology and Operative Intensive Care Medicine (CCM, CVK)  
27 Charité – Universitätsmedizin Berlin, corporate member of Freie Universität Berlin,  
28 Humboldt-Universität zu Berlin, and Berlin Institute of Health  
29 Augustenburger Platz 1, D-13353 Berlin, Germany  
30  
31

32 Phone: +49 30 450 551 002

33 Fax: +49 30 450 551 909

34 Email: [gunnar.lachmann@charite.de](mailto:gunnar.lachmann@charite.de)  
35  
36  
37  
38  
39  
40  
41

42 **Word and Element Counts**

43  
44 Abstract: 412

45  
46 Introduction: 553

47  
48 Discussion: 433

49  
50 Figures: 1

51  
52 Tables: 1  
53  
54  
55  
56  
57  
58  
59  
60

## Abstract

**Background:** Hemophagocytic Lymphohistiocytosis (HLH) in adults is characterized by toxic immune activation and a sepsis-like syndrome leading to high numbers of undiagnosed cases and mortality rates up to 68%. Early diagnosis and specific immune suppressive treatment is mandatory to avoid fatal outcome. Though, diagnostic criteria (HLH-2004) are adopted from pediatric HLH, and have not been validated in adults. Experimental studies suggest biomarkers to sufficiently diagnose HLH. However, investigation of biomarkers for diagnosis of adult HLH has not been labored, yet.

**Methods:** The Diagnostic Biomarkers for Adult Hemophagocytic Lymphohistiocytosis in Critically Ill Patients study (HEMICU) aims to estimate the incidence rate of adult HLH among suspected adult intensive care unit (ICU) patients. Screening for HLH will be performed in 16 ICUs of the Charité – Universitätsmedizin Berlin. Inclusion criteria are bicytopenia, hyperferritinemia ( $\geq 500 \mu\text{g/L}$ ), fever, or when HLH is suspected. Over a period of two years, we expect inclusion of about 100 patients with suspected HLH. HLH will be diagnosed if at least 5 HLH-2004 criteria are fulfilled together with an expert review, all other included patients will serve as controls. Secondly, a panel of potential biomarker candidates will be explored. DNA, plasma and serum will be stored in a biobank.

**Results:** Primary endpoint of the study is the incidence rate of adult HLH among suspected adult patients during ICU stay. Out of a variety of measured biomarkers, this study furthermore aims to find highly potential biomarkers for diagnosis of adult HLH in ICU.

**Conclusion:** The HEMICU study is the first study to estimate the incidence rate of adult HLH among suspected patients during ICU stay. Furthermore, we aim to

1  
2  
3 investigate biomarkers for diagnosis of adult HLH in ICU patients. Results of this  
4  
5 study will contribute to improved recognition and patient outcome of adult HLH in the  
6  
7 clinical routine.  
8  
9

10  
11  
12  
13  
14  
15 **Keywords:** Hemophagocytic Lymphohistiocytosis (HLH), Hemophagocytic syndrome  
16  
17 (HS), Macrophage activation syndrome (MAS), sepsis, biomarker, intensive care Unit  
18  
19 (ICU)  
20  
21  
22  
23  
24  
25  
26  
27  
28  
29  
30  
31  
32  
33  
34  
35  
36  
37  
38  
39  
40  
41  
42  
43  
44  
45  
46  
47  
48  
49  
50  
51  
52  
53  
54  
55  
56  
57  
58  
59  
60

## Background

Hemophagocytic Lymphohistiocytosis (HLH) is a hyperinflammatory syndrome due to toxic immune activation associated with multiple organ failure and high mortality in intensive care unit (ICU) patients [1-3]. Primary HLH due to genetic causes has been subject of extensive research in pediatric medicine resulting in an advanced understanding of its pathophysiology including identification of underlying genetic defects related to cytotoxic granule exocytosis [4]. However, much less is known about HLH in adults where the secondary form triggered by infections, autoimmune diseases, malignancies or immunosuppressive therapy is more common. Both hereditary primary and reactive secondary HLH are characterized by impaired immune function, i.e. impaired natural-killer (NK) or cytotoxic-T-cell function leading to abnormal activation of cytokine-releasing macrophages and T-cells and finally to an uncontrolled inflammatory condition known as cytokine storm [5].

Currently, diagnosis is based on the HLH-2004 criteria (Table 1) derived from the pediatric HLH-2004 protocol which has not been validated in adult HLH patients [6, 7]. Moreover, diagnosis of HLH in ICU-admitted patients is hampered by its sepsis-like presentation. Clinical features include repetitive fever, hepato- and/or splenomegaly and antibiotic-refractory infections as well as pulmonary and renal involvement with consequent multiple organ failure [7]. Lab findings may reveal cytopenia, hypertriglyceridemia, ferritin  $\geq 500 \mu\text{g/L}$ , and hypofibrinogenemia. Timely diagnosis is crucial to initiate adequate treatment and thus to improve the prognosis. As demonstrated by Jordan et al. [8], early therapy reduces mortality to 30-35%. However, up to 78% of all HLH cases remain undiagnosed leading to mortality rates as high as 68% [2, 9]. Given the lack of specific diagnostic tests and the established use of invalidated diagnostic criteria in adults, we aim to identify a biomarker panel of high sensitivity and specificity to allow early detection of HLH in critically ill patients.



1  
2  
3 This biomarker panel might help to differentiate HLH from sepsis between these two  
4  
5 types of critical illnesses for ICU patients.  
6  
7  
8  
9  
10  
11  
12  
13  
14  
15  
16  
17  
18  
19  
20  
21  
22  
23  
24  
25  
26  
27  
28  
29  
30  
31  
32  
33  
34  
35  
36  
37  
38  
39  
40  
41  
42  
43  
44  
45  
46  
47  
48  
49  
50  
51  
52  
53  
54  
55  
56  
57  
58  
59  
60

For peer review only

## Methods

### Design and screening

Over a two-year period, screening of all patients admitted to 16 ICUs of the Charité - Universitätsmedizin Berlin will be performed. As part of the process, electronic patient charts will be screened daily for bicytopenia by an automated script. All patients with bicytopenia are daily searched for HLH-2004 criteria (Table 1), the HScore [10] and suspected HLH by the study team. If the patient is highly suspicious for HLH, patients will be enrolled after informed consent by the patient itself or the legal representative. Immediately after study enrolment and before initiation of specific HLH treatment, whole blood samples will be obtained for all analyses. Additionally, plasma and serum samples as well as DNA will be stored in a biobank (Figure 1). HLH will be diagnosed if at least 5 HLH-2004 criteria are fulfilled and finally be confirmed after a case-by-case review by two HLH experts. The study aims to include at least 100 patients with suspected HLH. Patients in whom HLH is not confirmed will serve as controls.

**Table 1. HLH-2004 diagnostic criteria [6]**

#### **HLH-2004 diagnostic criteria of which at least 5 must be fulfilled**

---

Ferritin  $\geq 500$   $\mu\text{g/L}$

---

Fever ( $\geq 38.2$   $^{\circ}\text{C}$ )

---

Splenomegaly

---

Cytopenias in  $\geq 2$  lines (Hemoglobin  $< 9$  g/dL, platelets  $< 100$  /nL, neutrophils  $< 1.0$  /nL)

---

Hypertriglyceridemia and/or hypofibrinogenemia  
(fasting triglycerides  $\geq 265$  mg/dL, fibrinogen  $< 1.5$  g/L)

---

Hemophagocytosis in bone marrow or spleen or lymph nodes

---

1  
2  
3 Low or absent NK activity

4  
5 Soluble CD25 (soluble IL-2 receptor (sIL-2R))  $\geq 2,400$  U/mL  
6  
7  
8

9  
10 Study Population and eligibility criteria for patients  
11  
12

13  
14 Inclusion criteria:

- 15  
16
- 17 • Intensive care patients of at least 18 years old
  - 18 • Suspected or diagnosed HLH
  - 19 • Eligible to informed consent by the patient itself or the legal representative
- 20  
21  
22  
23  
24  
25

26  
27 Exclusion criteria:

- 28  
29
- 30 • Participation in an interventional study
  - 31 • Female patients with pregnancy or breastfeeding
- 32  
33  
34  
35  
36  
37

38 Setting

39  
40 Participating ICU include anesthesiological, surgical, medical, mixed and neurological  
41  
42 ICUs. In total, 16 ICUs of the Charité – Universitätsmedizin Berlin will contribute  
43  
44 patients.  
45  
46  
47  
48  
49  
50

51 Objectives and hypotheses

52  
53 This study aims to investigate critically ill patients for adult HLH and estimate its  
54  
55 incidence rate among suspected patients during ICU stay. Secondly, a panel of  
56  
57 various biomarkers candidates from experimental and pediatric studies will be  
58  
59 measured to explore diagnostic potential to diagnose HLH in adult ICU-admitted  
60

1  
2  
3 patients. As a result, HLH might be detected earlier leading to an improved outcome.  
4  
5 Highly sensitive biomarkers may also help to distinguish HLH from sepsis.  
6  
7  
8  
9

## 10 Statistical analyses

11  
12 Incidence rate of HLH among suspected adult patient during ICU stay will be  
13  
14 calculated with 95% confidence intervals. Investigation of potential biomarker will be  
15  
16 exploratory. Descriptive statistics between patient groups with confirmed HLH and  
17  
18 controls will incorporate mean and standard deviation or absolute and relative  
19  
20 frequencies depending on each variable's scale. Uni- and multivariable logistic  
21  
22 regression models with confirmed HLH diagnosis as outcome will be calculated for  
23  
24 different combinations of influencing variables and biomarkers. Receiver operator  
25  
26 characteristic (ROC) analysis will be performed to determine discrimination ability as  
27  
28 measured by the area under the curve (AUC) for each continuous biomarker.  
29  
30 Sensitivity and specificity within our patient sample will be given for cut-off points with  
31  
32 highest Youden index. Highly potential markers are found when sensitivity and  
33  
34 specificity each reach 90%.  
35  
36  
37  
38  
39  
40  
41  
42  
43

## 44 Outcome measures

### 45 Primary Endpoint

- 46 • Incidence rate of adult HLH among suspected patients during ICU stay

### 47 Secondary Endpoints

- 48 • Identification of highly sensitive and highly specific biomarkers to safely  
49 diagnose adult HLH in ICU
- 50 • Therapy of HLH by clinicians
- 51 • ICU and hospital length of stay
- 52 • Mortality and survival after 6 months

- Quality of life questionnaire 36-item short form health survey (SF-36) after 6 months [11]
- Human immunodeficiency virus (HIV) antibodies and -antigen
- Epstein Barr Virus (EBV) and Cytomegalovirus (CMV) viral loads
- Inflammatory markers (ferritin, C-reactive protein (CRP), procalcitonin (PCT), interleukin (IL)-1 $\beta$ , IL-6, IL-8, IL-10, IL-18, IL-33, tumor necrosis factor (TNF)- $\alpha$ , interferon (IFN)- $\gamma$ , sCD25, sCD163, presepsin) [12]
- Perforin and CD107a [13]
- Fibrinogen, triglycerides, bilirubin, lactate dehydrogenase (LDH), liver transaminases (ALAT and ASAT)
- Sodium, serum albumin, serum protein electrophoresis
- Detailed immune status (differential blood count, T cells (CD3+), B cells (CD19+), NK cells (CD16+), T helper cells (CD4+), cytotoxic T cells (CD8+), CD4 / CD8 ratio, HLA-DR of CD8+, CD11a of CD8-, CD57 of CD8-, CD28 of CD8+, HLA-DR of monocytes, CD56bright and CD69 of NK cells)
- Glycosylated ferritin [14] and microRNAs (miR-205-5p, miR-194-5p and miR-30c-5p) [15]
- Chemokines CCL2 (MCP-1), CCL3, CCL4, CCL5 (RANTES), CCL11 (Eotaxin), CCL19, CCL20, CXCL1 CXCL8 (IL-8), CXCL10 (IP-10) , CXCL12 (SDF1A) [16]
- HLA Typing
- Biobanking for future research questions (e.g. genetic polymorphisms and gene expression of PRF1, UNC13D, STX11, STXBP2 [7])

## Data collection

Data on all outcome measures will be collected prospectively. Further data including patient demographic data, past medical conditions, physicians' reports and routine laboratory results will be abstracted from the hospital's database. For follow-up six months after study inclusion, patients will be contacted either by telephone or by mail as indicated upon enrolment to assess health-related quality of life and mortality, respectively.

## Immunological measurements

Plasma concentrations of soluble IL-2R (sCD25) will be determined with the IMMULITE™ semi-automatic chemiluminescent immunoassay (Siemens Healthcare GmbH, Erlangen, Germany). Additional soluble factors IL-1 $\beta$ , IL-6, IL-8, IL-10, IL-18, IL-33, TNF- $\alpha$ , IFN- $\gamma$  will be measured by Meso Scale Discovery® (Meso Scale Diagnostics, Maryland USA). The kit provides all reagents, together with a 96-well plate with specific pre-coated spots, the detection antibodies and assay diluent. The standard will be reconstituted with assay diluent to obtain a lot-specific concentration which differs for all cytokines. The vials are inverted multiple times for mixing and, after vortexing, the vials will be kept for 5–10 min at RT and then on ice until use. Preparation of further serial 1:5 dilution of Cytokine Standard is performed. Quality Controls (low and high) are components of the kits and respective Quality Control ranges are provided by the manufacturer. The Quality Controls (low and high) will be reconstituted with 250  $\mu$ l of deionized water. The vials are inverted multiple times for mixing and, after vortexing, kept for 5–10 min at RT and then on ice until use. Plasma concentrations of soluble CD163 protein levels from plasma will be determined with the Quantikine® ELISA human CD163 Immunoassay (R&D Systems, Minneapolis, USA). The minimum detectable dose ranged from 0.058-0.613 ng/mL. For measurement of presepsin, Presepsin (Human) ELISA Kit will be used (BioVision, California, USA) with a detection range of 0.156-10 ng/mL.

Flow cytometric analysis of human lymphocyte subsets in EDTA whole blood will be performed, as described recently [17]. Briefly, the following mouse anti-human fluorescently-labelled monoclonal antibodies (mAb) are used for quantification of lymphocyte subsets and analysis of T and NK cell activation markers: cluster of

1  
2  
3 differentiation (CD)3 Allophycocyanine-Alexa Fluor 750 (APC-A750), CD4 energy  
4 coupled dye (ECD), CD8 APC, CD11a Fluorescein isothiocyanate (FITC), CD14  
5  
6 FITC, CD16 Phycoerythrin (PE), CD19 PE-Cy5.5, CD28 PC5, CD45 Krome-Orange  
7  
8 (KrO), CD56 PE or CD56 APC, CD57 Pacific Blue (PB), CD69 PE, HLA-DR PE, (all  
9  
10 from Beckman Coulter). Functional analysis of NK cells will be performed using the  
11  
12 CD107a degranulation assay according to a protocol published by Bryceson et al.  
13  
14 [18]. Briefly, peripheral blood mononuclear cells (PBMC) will be isolated by density  
15  
16 gradient centrifugation and incubated overnight in the presence or absence of 3600  
17  
18 IU/mL recombinant interleukin-2 (PeproTech). PBMC will then be incubated with the  
19  
20 target cell line K562 (ATCC) in a 1:1 ratio for 3 hours. Subsequently, CD107a  
21  
22 expression on NK cells is assessed by staining samples with fluorescently-labelled  
23  
24 antibodies against lineage markers (see above) and an anti-CD107a FITC-labelled  
25  
26 mAb (eBioscience). Perforin expression in NK cells will be assessed by intracellular  
27  
28 staining in unstimulated NK cells using the PerFix-nc reagent (Beckman Coulter) for  
29  
30 cell permeabilization and an APC-labelled anti-perforin mAb (eBioscience) according  
31  
32 the manufacturer's instructions.  
33  
34  
35  
36  
37  
38  
39

40 Expression of human leukocyte antigen-DR (HLA-DR) on monocytes (mHLA-DR) will  
41  
42 be determined by flow cytometry using a highly standardized quantitative assay, as  
43  
44 described earlier [19]. In short, whole blood in Vacutainer tubes (BD Biosciences,  
45  
46 San Jose, CA, USA) containing EDTA are stained with 20 µl of monoclonal  
47  
48 phycoerythrin-conjugated anti-HLA-DR and PerCP-Cy5.5-conjugated anti-CD14  
49  
50 antibodies (Quantibrite HLA-DR/monocyte™; BD Biosciences) in the dark at room  
51  
52 temperature for 30 min. Erythrocyte lysis will be done with 0.5 ml of lysing solution  
53  
54 (BD Biosciences) for another 30 min at room temperature. Finally, the cells are  
55  
56 washed with 1ml PBS buffer containing 2% FCS and analyzed on a Navios flow  
57  
58 cytometer (Beckman Coulter, Krefeld, Germany). HLA-DR surface expression on  
59  
60

1  
2  
3 monocytes will be calculated as monoclonal antibodies bound per cell (mAb/cell)  
4  
5 using the QuantiBRITE™ PE calibration beads. All flow cytometric analyses will be  
6  
7 performed on a ten-color Navios flow cytometer using the Navios Software (Beckman  
8  
9 Coulter). Human glycosylated ferritin will be determined by Enzyme-linked  
10  
11 Immunosorbent Assay (MyBioSource, San Diego, USA). The sensitivity of this kit is  
12  
13 2.0 ng/mL.  
14  
15

16  
17 The expression of miR-205-5p, miR-194-5p and miR-30c-5p will be determined in  
18  
19 whole blood, plasma and serum using a protocol published by Balcells et al. [20].  
20  
21 Briefly, after RNA isolation, miRNAs are polyadenylated and then reverse transcribed  
22  
23 with a special primer (RT-primer). For quantitative real time PCR (qPCR), two  
24  
25 specific primers for each miRNA are designed using a software tool from Busk [21].  
26  
27 All primers are tested for specificity and efficiency. The qPCR will be performed with  
28  
29 SYBR Green using the QuantStudio5® (Thermo Fisher, Darmstadt, Germany). The  
30  
31 quantification of chemokines involved in cell trafficking and effector functions of  
32  
33 lymphocytes, granulocytes, and mononuclear cells from the CC subfamily (CCL2,  
34  
35 CCL3, CCL4, CCL5, CCL11, CCL19, and CCL20) as well as the CXC subfamily  
36  
37 (CXCL1, CXCL8 (IL-8), CXCL10, and CXCL12) will be performed with the  
38  
39 LUNARIS™ Human 11-Plex Chemokine Kit (AYOXXA Biosystems GmbH, Cologne,  
40  
41 Germany).  
42  
43  
44  
45  
46  
47

48  
49 Determination of human leukocyte antigen (HLA) typing will be performed by reverse  
50  
51 sequence-specific oligonucleotide (rSSO) assay LABType® (One Lambda, Canoga  
52  
53 Park, CA, USA). Typing will be assessed on an intermediate resolution level for HLA-  
54  
55 A, -B, -C, -DRB1, -DQA1 and -DQB1. The assay will be performed according to the  
56  
57 manufacturer's instructions and data will be acquired on a Luminex® FlexMAP 3D  
58  
59 machine (Luminex, Austin, TX, USA).  
60



## Informed consent in critically ill patients

Written informed consent will be obtained from all patients or their legally authorized representatives. Consent for genetic analyzes in future projects will be obtained separately.

## Sample size

The true incidence of adult HLH in ICU is unknown. According to our own research [9] and the annual number of patients admitted to our ICU, we expect to see about 200 patients with diagnosed HLH over two years, and about 400 with suspected HLH. Of these, we hope to include at least 100 patients with suspected HLH into the study, of whom about 50 patients are expected to be diagnosed with HLH. When the sample size is 100, a two-sided 95.0% confidence interval for a single proportion using the large sample normal approximation will extend 0.1 from the observed proportion for an expected proportion of 0.5 (nQuery Advisor 7.0).

## Ethics

The institutional ethics committee approved this study on August 1, 2018 (EA4/006/18). The data protection commissioner also approved the study (91-SP-18), which was registered with clinicaltrials.gov (NCT03510650) on April 27, 2018.

## Discussion

HLH is a rare condition in adults with poor prognosis. Due to the paucity of data available on adult HLH, recognition remains low resulting in delayed diagnosis and

1  
2  
3 treatment and finally, fatal outcome. This is the first prospective study to  
4  
5 systematically investigate routine and non-routine parameters for biomarker  
6  
7 development. Importantly, the daily systematic screening will help to identify HLH  
8  
9 patients at an early stage of the syndrome which ultimately will improve patient care,  
10  
11 patients' safety and outcome. Moreover, describing a distinct pattern of biomarkers  
12  
13 generates new hypothesis for future research thereby potentially providing targets for  
14  
15 therapy development. With regard to clinical practice, the HEMICU study seeks to  
16  
17 inform clinicians about HLH and ICU therapies to improve outcomes for HLH  
18  
19 patients. However, it is of note that this study does not seek to advice the clinician in  
20  
21 charge to change therapy. No change in routine management is intended due to the  
22  
23 observational study design and final decisions are left to the discretion of the  
24  
25 responsible clinician.  
26  
27  
28  
29  
30  
31  
32  
33

### 34 Strengths and Limitations

35  
36 This study might be limited in that it only includes ICU patients and findings will not  
37  
38 be generalizable to non-ICU patients. In addition, patients might have developed  
39  
40 HLH before ICU admission and will thus be detected and measurements obtained at  
41  
42 an advanced stage of the disease possibly limiting comparability of the results.  
43  
44 Moreover, we will not assess longitudinal parameters preventing us from describing  
45  
46 dynamics of biomarkers over time. However, as this study aims to develop a tool  
47  
48 facilitating diagnosis at the earliest possible time point, study endpoints will not be  
49  
50 affected by lack of repeated measurements. Possible advances of this study include  
51  
52 comprehensive lab testing of parameters, which have previously been suggested to  
53  
54 be associated with HLH [12-16]. Previous studies, most of which are retrospective in  
55  
56  
57  
58  
59  
60

1  
2  
3 nature, aimed at identifying associations to detect risk factors [2, 22]. Therefore, the  
4  
5 HEMICU study is the first prospective study of its kind.  
6  
7  
8  
9

## 10 Conclusion

11  
12 HLH is a life threatening but poorly investigated condition in adult ICU patients. The  
13  
14 HEMICU study is the first prospective study in adult ICU patients and aims to  
15  
16 estimate the incidence rate of adult HLH among suspected patients during ICU stay.  
17  
18 Furthermore, we aim to investigate biomarkers for diagnosis of adult HLH in ICU  
19  
20 patients. Results of this study will contribute to improved recognition of adult HLH in  
21  
22 the clinical routine. Potentially earlier diagnosis and thus more effective treatment of  
23  
24 adult HLH could lead to improved patient outcome. Moreover, our study will provide a  
25  
26 better understanding of adult HLH pathophysiology and the biobanking of DNA,  
27  
28 plasma and serum will generate a data base to investigate future research questions.  
29  
30  
31  
32  
33  
34  
35  
36  
37  
38  
39

## 40 Acknowledgements

41 We thank the Department of Cardiovascular Surgery, the Department of Surgery  
42  
43 CCM/CVK, the Medical Department, Division of Nephrology and Internal Intensive  
44  
45 Care Medicine (CVK/CCM), the Medical Department, Division of Infectiology and  
46  
47 Pneumonology, the Medical Department, Division of Cardiology (CVK), the  
48  
49 Department of Cardiology (CBF), the Department of Neurology with Experimental  
50  
51 Neurology, and the Department of Anesthesiology and Operative Intensive Care  
52  
53 Medicine (CBF) for being part of our study and excellent collaboration. We also thank  
54  
55 the BIH Biobank Core Facility for support, coordination and storage of blood samples  
56  
57 (biobank). We are grateful to Dr. Kathrin Scholtz for monitoring the study.  
58  
59  
60

## Competing interests

The authors declare no conflicts of interest.

## References

1. Buyse, S., et al., *Critical care management of patients with hemophagocytic lymphohistiocytosis*. Intensive Care Med, 2010. **36**(10): p. 1695-702.
2. Barba, T., et al., *Hemophagocytic Lymphohistiocytosis in Intensive Care Unit: A 71-Case Strobe-Compliant Retrospective Study*. Medicine (Baltimore), 2015. **94**(51): p. e2318.
3. Lachmann, G., et al., *[Hemophagocytic lymphohistiocytosis : A diagnostic challenge on the ICU]*. Anaesthetist, 2016. **65**(10): p. 776-786.
4. Devitt, K., et al., *Hemophagocytic lymphohistiocytosis secondary to T-cell/histiocyte-rich large B-cell lymphoma*. Leuk Res Rep, 2014. **3**(2): p. 42-5.
5. Filipovich, A.H., *Hemophagocytic lymphohistiocytosis (HLH) and related disorders*. Hematology Am Soc Hematol Educ Program, 2009: p. 127-31.
6. Henter, J.I., et al., *HLH-2004: Diagnostic and therapeutic guidelines for hemophagocytic lymphohistiocytosis*. Pediatr Blood Cancer, 2007. **48**(2): p. 124-31.
7. Ramos-Casals, M., et al., *Adult haemophagocytic syndrome*. Lancet, 2014. **383**(9927): p. 1503-1516.
8. Jordan, M.B., et al., *How I treat hemophagocytic lymphohistiocytosis*. Blood, 2011. **118**(15): p. 4041-52.
9. Lachmann, G., et al., *Hemophagocytic Lymphohistiocytosis: Potentially Underdiagnosed in Intensive Care Units*. Shock, 2018. **50**(2): p. 149-155.
10. Fardet, L., et al., *Development and validation of the HScore, a score for the diagnosis of reactive hemophagocytic syndrome*. Arthritis Rheumatol, 2014. **66**(9): p. 2613-20.
11. Chrispin, P.S., et al., *Short Form 36 in the intensive care unit: assessment of acceptability, reliability and validity of the questionnaire*. Anaesthesia, 1997. **52**(1): p. 15-23.
12. Put, K., et al., *Cytokines in systemic juvenile idiopathic arthritis and haemophagocytic lymphohistiocytosis: tipping the balance between interleukin-18 and interferon-gamma*. Rheumatology (Oxford), 2015. **54**(8): p. 1507-17.
13. Rubin, T.S., et al., *Perforin and CD107a testing is superior to NK cell function testing for screening patients for genetic HLH*. Blood, 2017. **129**(22): p. 2993-2999.
14. Nabergoj, M., et al., *Diagnostic and prognostic value of low percentage of glycosylated ferritin in acquired hemophagocytic lymphohistiocytosis: A single-center study*. Int J Lab Hematol, 2017. **39**(6): p. 620-624.
15. Bay, A., et al., *Evaluation of the plasma micro RNA expression levels in secondary hemophagocytic lymphohistiocytosis*. Mediterr J Hematol Infect Dis, 2013. **5**(1): p. e2013066.
16. Bracaglia, C., et al., *Elevated circulating levels of interferon-gamma and interferon-gamma-induced chemokines characterise patients with macrophage activation syndrome complicating systemic juvenile idiopathic arthritis*. Ann Rheum Dis, 2017. **76**(1): p. 166-172.
17. Klehmet, J., et al., *Circulating lymphocyte and T memory subsets in glucocorticosteroid versus IVIG treated patients with CIDP*. J Neuroimmunol, 2015. **283**: p. 17-22.

- 1
- 2
- 3 18. Bryceson, Y.T., et al., *A prospective evaluation of degranulation assays in the rapid diagnosis*
- 4 *of familial hemophagocytic syndromes*. *Blood*, 2012. **119**(12): p. 2754-63.
- 5 19. Docke, W.D., et al., *Monitoring temporary immunodepression by flow cytometric*
- 6 *measurement of monocytic HLA-DR expression: a multicenter standardized study*. *Clin Chem*,
- 7 2005. **51**(12): p. 2341-7.
- 8 20. Balcells, I., S. Cirera, and P.K. Busk, *Specific and sensitive quantitative RT-PCR of miRNAs with*
- 9 *DNA primers*. *BMC Biotechnol*, 2011. **11**: p. 70.
- 10 21. Busk, P.K., *A tool for design of primers for microRNA-specific quantitative RT-qPCR*. *BMC*
- 11 *Bioinformatics*, 2014. **15**: p. 29.
- 12 22. Ishii, E., et al., *Nationwide survey of hemophagocytic lymphohistiocytosis in Japan*. *Int J*
- 13 *Hematol*, 2007. **86**(1): p. 58-65.
- 14
- 15
- 16
- 17
- 18
- 19
- 20
- 21
- 22
- 23
- 24
- 25
- 26
- 27
- 28
- 29
- 30
- 31
- 32
- 33
- 34
- 35
- 36
- 37
- 38
- 39
- 40
- 41
- 42
- 43
- 44
- 45
- 46
- 47
- 48
- 49
- 50
- 51
- 52
- 53
- 54
- 55
- 56
- 57
- 58
- 59
- 60

For peer review only

## Funding

Gunnar Lachmann is participant of the Clinician Scientist Program granted by the Berlin Institute of Health (BIH). The study is supported by the Department of Anesthesiology and Operative Intensive Care Medicine (CCM, CVK), Charité – Universitätsmedizin Berlin.

## Authors' contributions

Study concept: GL. Conceived and designed the experiments: GL, CvH, NP, CM, PL, TS, NL, HDV, DK. Performing the experiments: GL, CK, CvH, NP, CM, PN, FSS, GV, FB, NU, UK, NL, LA. Analyzing the data: GL, CK, PN, FSS, SKP, JK, PL, TS. Wrote the manuscript: GL, CK, CvH, NP, CM, SKP, NL, LA, DK. Commented on the manuscript: all authors.

## Data statement

Due to legal restrictions imposed by the ethics committee of the Charité – Universitätsmedizin Berlin and the data protection commissioner of the Charité – Universitätsmedizin Berlin, public sharing of study data with other researchers or entities is not allowed. Requests may be sent to [dai-researchdata@charite.de](mailto:dai-researchdata@charite.de).

## Figure legends

Figure 1. Screening protocol and blood sampling.

1  
2  
3  
4  
5  
6  
7  
8  
9  
10  
11  
12  
13  
14  
15  
16  
17  
18  
19  
20  
21  
22  
23  
24  
25  
26  
27  
28  
29  
30  
31  
32  
33  
34  
35  
36  
37  
38  
39  
40  
41  
42  
43  
44  
45  
46  
47  
48  
49  
50  
51  
52  
53  
54  
55  
56  
57  
58  
59  
60

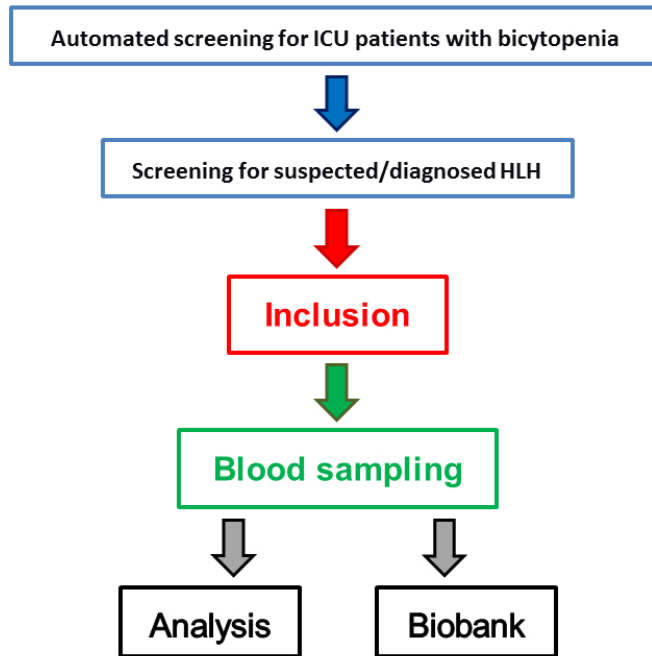

Figure 1

Figure 1 / Screening protocol and blood sampling.

254x190mm (96 x 96 DPI)

# Reporting checklist for protocol of a clinical trial.

Based on the SPIRIT guidelines.

## Instructions to authors

Complete this checklist by entering the page numbers from your manuscript where readers will find each of the items listed below.

Your article may not currently address all the items on the checklist. Please modify your text to include the missing information. If you are certain that an item does not apply, please write "n/a" and provide a short explanation.

Upload your completed checklist as an extra file when you submit to a journal.

In your methods section, say that you used the SPIRIT reporting guidelines, and cite them as:

Chan A-W, Tetzlaff JM, Altman DG, Laupacis A, Gøtzsche PC, Krleža-Jerić K, Hróbjartsson A, Mann H, Dickersin K, Berlin J, Doré C, Parulekar W, Summerskill W, Groves T, Schulz K, Sox H, Rockhold FW, Rennie D, Moher D. SPIRIT 2013 Statement: Defining standard protocol items for clinical trials. *Ann Intern Med.* 2013;158(3):200-207

|                                             |                     | Reporting Item                                                                                               | Page Number |
|---------------------------------------------|---------------------|--------------------------------------------------------------------------------------------------------------|-------------|
| <b>Administrative information</b>           |                     |                                                                                                              |             |
| Title                                       | <a href="#">#1</a>  | Descriptive title identifying the study design, population, interventions, and, if applicable, trial acronym | 1           |
| Trial registration                          | <a href="#">#2a</a> | Trial identifier and registry name. If not yet registered, name of intended registry                         | 14          |
| Trial registration: data set                | <a href="#">#2b</a> | All items from the World Health Organization Trial Registration Data Set                                     | 14          |
| Protocol version                            | <a href="#">#3</a>  | Date and version identifier                                                                                  | 14          |
| Funding                                     | <a href="#">#4</a>  | Sources and types of financial, material, and other support                                                  | 16          |
| Roles and responsibilities: contributorship | <a href="#">#5a</a> | Names, affiliations, and roles of protocol contributors                                                      | 1           |



|    |                           |                     |                                                                      |    |
|----|---------------------------|---------------------|----------------------------------------------------------------------|----|
| 1  | Roles and                 | <a href="#">#5b</a> | Name and contact information for the trial sponsor                   | 16 |
| 2  | responsibilities:         |                     |                                                                      |    |
| 3  | sponsor contact           |                     |                                                                      |    |
| 4  | information               |                     |                                                                      |    |
| 5  |                           |                     |                                                                      |    |
| 6  |                           |                     |                                                                      |    |
| 7  |                           |                     |                                                                      |    |
| 8  | Roles and                 | <a href="#">#5c</a> | Role of study sponsor and funders, if any, in study design;          | 16 |
| 9  | responsibilities:         |                     | collection, management, analysis, and interpretation of data;        |    |
| 10 | sponsor and funder        |                     | writing of the report; and the decision to submit the report for     |    |
| 11 |                           |                     | publication, including whether they will have ultimate authority     |    |
| 12 |                           |                     | over any of these activities                                         |    |
| 13 |                           |                     |                                                                      |    |
| 14 |                           |                     |                                                                      |    |
| 15 |                           |                     |                                                                      |    |
| 16 | Roles and                 | <a href="#">#5d</a> | Composition, roles, and responsibilities of the coordinating centre, | 16 |
| 17 | responsibilities:         |                     | steering committee, endpoint adjudication committee, data            |    |
| 18 | committees                |                     | management team, and other individuals or groups overseeing the      |    |
| 19 |                           |                     | trial, if applicable (see Item 21a for data monitoring committee)    |    |
| 20 |                           |                     |                                                                      |    |
| 21 |                           |                     |                                                                      |    |
| 22 |                           |                     |                                                                      |    |
| 23 | <b>Introduction</b>       |                     |                                                                      |    |
| 24 |                           |                     |                                                                      |    |
| 25 | Background and            | <a href="#">#6a</a> | Description of research question and justification for undertaking   | 5  |
| 26 | rationale                 |                     | the trial, including summary of relevant studies (published and      |    |
| 27 |                           |                     | unpublished) examining benefits and harms for each intervention      |    |
| 28 |                           |                     |                                                                      |    |
| 29 |                           |                     |                                                                      |    |
| 30 | Background and            | <a href="#">#6b</a> | Explanation for choice of comparators                                | 5  |
| 31 | rationale: choice of      |                     |                                                                      |    |
| 32 | comparators               |                     |                                                                      |    |
| 33 |                           |                     |                                                                      |    |
| 34 |                           |                     |                                                                      |    |
| 35 |                           |                     |                                                                      |    |
| 36 | Objectives                | <a href="#">#7</a>  | Specific objectives or hypotheses                                    | 5  |
| 37 |                           |                     |                                                                      |    |
| 38 | Trial design              | <a href="#">#8</a>  | Description of trial design including type of trial (eg, parallel    | 7  |
| 39 |                           |                     | group, crossover, factorial, single group), allocation ratio, and    |    |
| 40 |                           |                     | framework (eg, superiority, equivalence, non-inferiority,            |    |
| 41 |                           |                     | exploratory)                                                         |    |
| 42 |                           |                     |                                                                      |    |
| 43 |                           |                     |                                                                      |    |
| 44 |                           |                     |                                                                      |    |
| 45 | <b>Methods:</b>           |                     |                                                                      |    |
| 46 | <b>Participants,</b>      |                     |                                                                      |    |
| 47 | <b>interventions, and</b> |                     |                                                                      |    |
| 48 | <b>outcomes</b>           |                     |                                                                      |    |
| 49 |                           |                     |                                                                      |    |
| 50 |                           |                     |                                                                      |    |
| 51 | Study setting             | <a href="#">#9</a>  | Description of study settings (eg, community clinic, academic        | 7  |
| 52 |                           |                     | hospital) and list of countries where data will be collected.        |    |
| 53 |                           |                     | Reference to where list of study sites can be obtained               |    |
| 54 |                           |                     |                                                                      |    |
| 55 |                           |                     |                                                                      |    |
| 56 |                           |                     |                                                                      |    |
| 57 | Eligibility criteria      | <a href="#">#10</a> | Inclusion and exclusion criteria for participants. If applicable,    | 8  |
| 58 |                           |                     | eligibility criteria for study centres and individuals who will      |    |
| 59 |                           |                     |                                                                      |    |
| 60 |                           |                     |                                                                      |    |

perform the interventions (eg, surgeons, psychotherapists)

|    |                      |                      |                                                                       |
|----|----------------------|----------------------|-----------------------------------------------------------------------|
| 1  |                      |                      |                                                                       |
| 2  |                      |                      |                                                                       |
| 3  | Interventions:       | <a href="#">#11a</a> | Interventions for each group with sufficient detail to allow          |
| 4  | description          |                      | replication, including how and when they will be administered         |
| 5  |                      |                      |                                                                       |
| 6  | Interventions:       | <a href="#">#11b</a> | Criteria for discontinuing or modifying allocated interventions for a |
| 7  | modifications        |                      | given trial participant (eg, drug dose change in response to harms,   |
| 8  |                      |                      | participant request, or improving / worsening disease)                |
| 9  |                      |                      |                                                                       |
| 10 |                      |                      |                                                                       |
| 11 | Interventions:       | <a href="#">#11c</a> | Strategies to improve adherence to intervention protocols, and any    |
| 12 | adherence            |                      | procedures for monitoring adherence (eg, drug tablet return;          |
| 13 |                      |                      | laboratory tests)                                                     |
| 14 |                      |                      |                                                                       |
| 15 |                      |                      |                                                                       |
| 16 | Interventions:       | <a href="#">#11d</a> | Relevant concomitant care and interventions that are permitted or     |
| 17 | concomitant care     |                      | prohibited during the trial                                           |
| 18 |                      |                      |                                                                       |
| 19 |                      |                      |                                                                       |
| 20 |                      |                      |                                                                       |
| 21 | Outcomes             | <a href="#">#12</a>  | Primary, secondary, and other outcomes, including the specific        |
| 22 |                      |                      | measurement variable (eg, systolic blood pressure), analysis metric   |
| 23 |                      |                      | (eg, change from baseline, final value, time to event), method of     |
| 24 |                      |                      | aggregation (eg, median, proportion), and time point for each         |
| 25 |                      |                      | outcome. Explanation of the clinical relevance of chosen efficacy     |
| 26 |                      |                      | and harm outcomes is strongly recommended                             |
| 27 |                      |                      |                                                                       |
| 28 |                      |                      |                                                                       |
| 29 |                      |                      |                                                                       |
| 30 | Participant timeline | <a href="#">#13</a>  | Time schedule of enrolment, interventions (including any run-ins      |
| 31 |                      |                      | and washouts), assessments, and visits for participants. A            |
| 32 |                      |                      | schematic diagram is highly recommended (see Figure)                  |
| 33 |                      |                      |                                                                       |
| 34 |                      |                      |                                                                       |
| 35 |                      |                      |                                                                       |
| 36 | Sample size          | <a href="#">#14</a>  | Estimated number of participants needed to achieve study              |
| 37 |                      |                      | objectives and how it was determined, including clinical and          |
| 38 |                      |                      | statistical assumptions supporting any sample size calculations       |
| 39 |                      |                      |                                                                       |
| 40 |                      |                      |                                                                       |
| 41 | Recruitment          | <a href="#">#15</a>  | Strategies for achieving adequate participant enrolment to reach      |
| 42 |                      |                      | target sample size                                                    |
| 43 |                      |                      |                                                                       |
| 44 |                      |                      |                                                                       |

**Methods: Assignment  
of interventions (for  
controlled trials)**

|    |                      |                      |                                                                      |
|----|----------------------|----------------------|----------------------------------------------------------------------|
| 45 |                      |                      |                                                                      |
| 46 |                      |                      |                                                                      |
| 47 |                      |                      |                                                                      |
| 48 |                      |                      |                                                                      |
| 49 |                      |                      |                                                                      |
| 50 | Allocation: sequence | <a href="#">#16a</a> | Method of generating the allocation sequence (eg, computer-          |
| 51 | generation           |                      | generated random numbers), and list of any factors for               |
| 52 |                      |                      | stratification. To reduce predictability of a random sequence,       |
| 53 |                      |                      | details of any planned restriction (eg, blocking) should be provided |
| 54 |                      |                      | in a separate document that is unavailable to those who enrol        |
| 55 |                      |                      | participants or assign interventions                                 |
| 56 |                      |                      |                                                                      |
| 57 |                      |                      |                                                                      |
| 58 |                      |                      |                                                                      |
| 59 |                      |                      |                                                                      |
| 60 |                      |                      |                                                                      |

|    |                        |                      |                                                                       |   |
|----|------------------------|----------------------|-----------------------------------------------------------------------|---|
| 1  | Allocation concealment | <a href="#">#16b</a> | Mechanism of implementing the allocation sequence (eg, central        | 7 |
| 2  | mechanism              |                      | telephone; sequentially numbered, opaque, sealed envelopes),          |   |
| 3  |                        |                      | describing any steps to conceal the sequence until interventions are  |   |
| 4  |                        |                      | assigned                                                              |   |
| 5  |                        |                      |                                                                       |   |
| 6  |                        |                      |                                                                       |   |
| 7  |                        |                      |                                                                       |   |
| 8  | Allocation:            | <a href="#">#16c</a> | Who will generate the allocation sequence, who will enrol             | 7 |
| 9  | implementation         |                      | participants, and who will assign participants to interventions       |   |
| 10 |                        |                      |                                                                       |   |
| 11 | Blinding (masking)     | <a href="#">#17a</a> | Who will be blinded after assignment to interventions (eg, trial      | 7 |
| 12 |                        |                      | participants, care providers, outcome assessors, data analysts), and  |   |
| 13 |                        |                      | how                                                                   |   |
| 14 |                        |                      |                                                                       |   |
| 15 |                        |                      |                                                                       |   |
| 16 |                        |                      |                                                                       |   |
| 17 | Blinding (masking):    | <a href="#">#17b</a> | If blinded, circumstances under which unblinding is permissible,      | 7 |
| 18 | emergency unblinding   |                      | and procedure for revealing a participant's allocated intervention    |   |
| 19 |                        |                      | during the trial                                                      |   |
| 20 |                        |                      |                                                                       |   |
| 21 |                        |                      |                                                                       |   |
| 22 | <b>Methods: Data</b>   |                      |                                                                       |   |
| 23 | <b>collection,</b>     |                      |                                                                       |   |
| 24 | <b>management, and</b> |                      |                                                                       |   |
| 25 | <b>analysis</b>        |                      |                                                                       |   |
| 26 |                        |                      |                                                                       |   |
| 27 |                        |                      |                                                                       |   |
| 28 |                        |                      |                                                                       |   |
| 29 | Data collection plan   | <a href="#">#18a</a> | Plans for assessment and collection of outcome, baseline, and other   | 7 |
| 30 |                        |                      | trial data, including any related processes to promote data quality   |   |
| 31 |                        |                      | (eg, duplicate measurements, training of assessors) and a             |   |
| 32 |                        |                      | description of study instruments (eg, questionnaires, laboratory      |   |
| 33 |                        |                      | tests) along with their reliability and validity, if known. Reference |   |
| 34 |                        |                      | to where data collection forms can be found, if not in the protocol   |   |
| 35 |                        |                      |                                                                       |   |
| 36 |                        |                      |                                                                       |   |
| 37 |                        |                      |                                                                       |   |
| 38 |                        |                      |                                                                       |   |
| 39 | Data collection plan:  | <a href="#">#18b</a> | Plans to promote participant retention and complete follow-up,        | 7 |
| 40 | retention              |                      | including list of any outcome data to be collected for participants   |   |
| 41 |                        |                      | who discontinue or deviate from intervention protocols                |   |
| 42 |                        |                      |                                                                       |   |
| 43 |                        |                      |                                                                       |   |
| 44 | Data management        | <a href="#">#19</a>  | Plans for data entry, coding, security, and storage, including any    | 7 |
| 45 |                        |                      | related processes to promote data quality (eg, double data entry;     |   |
| 46 |                        |                      | range checks for data values). Reference to where details of data     |   |
| 47 |                        |                      | management procedures can be found, if not in the protocol            |   |
| 48 |                        |                      |                                                                       |   |
| 49 |                        |                      |                                                                       |   |
| 50 |                        |                      |                                                                       |   |
| 51 | Statistics: outcomes   | <a href="#">#20a</a> | Statistical methods for analysing primary and secondary outcomes.     | 9 |
| 52 |                        |                      | Reference to where other details of the statistical analysis plan can |   |
| 53 |                        |                      | be found, if not in the protocol                                      |   |
| 54 |                        |                      |                                                                       |   |
| 55 |                        |                      |                                                                       |   |
| 56 | Statistics: additional | <a href="#">#20b</a> | Methods for any additional analyses (eg, subgroup and adjusted        | 9 |
| 57 | analyses               |                      | analyses)                                                             |   |
| 58 |                        |                      |                                                                       |   |
| 59 |                        |                      |                                                                       |   |
| 60 |                        |                      |                                                                       |   |

|    |                            |                      |                                                                         |    |
|----|----------------------------|----------------------|-------------------------------------------------------------------------|----|
| 1  | Statistics: analysis       | <a href="#">#20c</a> | Definition of analysis population relating to protocol non-             | 9  |
| 2  | population and missing     |                      | adherence (eg, as randomised analysis), and any statistical methods     |    |
| 3  | data                       |                      | to handle missing data (eg, multiple imputation)                        |    |
| 4  |                            |                      |                                                                         |    |
| 5  |                            |                      |                                                                         |    |
| 6  | <b>Methods: Monitoring</b> |                      |                                                                         |    |
| 7  |                            |                      |                                                                         |    |
| 8  | Data monitoring:           | <a href="#">#21a</a> | Composition of data monitoring committee (DMC); summary of its          | 7  |
| 9  | formal committee           |                      | role and reporting structure; statement of whether it is independent    |    |
| 10 |                            |                      | from the sponsor and competing interests; and reference to where        |    |
| 11 |                            |                      | further details about its charter can be found, if not in the protocol. |    |
| 12 |                            |                      | Alternatively, an explanation of why a DMC is not needed                |    |
| 13 |                            |                      |                                                                         |    |
| 14 |                            |                      |                                                                         |    |
| 15 |                            |                      |                                                                         |    |
| 16 |                            |                      |                                                                         |    |
| 17 | Data monitoring:           | <a href="#">#21b</a> | Description of any interim analyses and stopping guidelines,            | 7  |
| 18 | interim analysis           |                      | including who will have access to these interim results and make        |    |
| 19 |                            |                      | the final decision to terminate the trial                               |    |
| 20 |                            |                      |                                                                         |    |
| 21 |                            |                      |                                                                         |    |
| 22 | Harms                      | <a href="#">#22</a>  | Plans for collecting, assessing, reporting, and managing solicited      | 7  |
| 23 |                            |                      | and spontaneously reported adverse events and other unintended          |    |
| 24 |                            |                      | effects of trial interventions or trial conduct                         |    |
| 25 |                            |                      |                                                                         |    |
| 26 |                            |                      |                                                                         |    |
| 27 |                            |                      |                                                                         |    |
| 28 | Auditing                   | <a href="#">#23</a>  | Frequency and procedures for auditing trial conduct, if any, and        | 7  |
| 29 |                            |                      | whether the process will be independent from investigators and the      |    |
| 30 |                            |                      | sponsor                                                                 |    |
| 31 |                            |                      |                                                                         |    |
| 32 |                            |                      |                                                                         |    |
| 33 | <b>Ethics and</b>          |                      |                                                                         |    |
| 34 | <b>dissemination</b>       |                      |                                                                         |    |
| 35 |                            |                      |                                                                         |    |
| 36 |                            |                      |                                                                         |    |
| 37 | Research ethics            | <a href="#">#24</a>  | Plans for seeking research ethics committee / institutional review      | 14 |
| 38 | approval                   |                      | board (REC / IRB) approval                                              |    |
| 39 |                            |                      |                                                                         |    |
| 40 |                            |                      |                                                                         |    |
| 41 | Protocol amendments        | <a href="#">#25</a>  | Plans for communicating important protocol modifications (eg,           | 14 |
| 42 |                            |                      | changes to eligibility criteria, outcomes, analyses) to relevant        |    |
| 43 |                            |                      | parties (eg, investigators, REC / IRBs, trial participants, trial       |    |
| 44 |                            |                      | registries, journals, regulators)                                       |    |
| 45 |                            |                      |                                                                         |    |
| 46 |                            |                      |                                                                         |    |
| 47 | Consent or assent          | <a href="#">#26a</a> | Who will obtain informed consent or assent from potential trial         | 14 |
| 48 |                            |                      | participants or authorised surrogates, and how (see Item 32)            |    |
| 49 |                            |                      |                                                                         |    |
| 50 |                            |                      |                                                                         |    |
| 51 | Consent or assent:         | <a href="#">#26b</a> | Additional consent provisions for collection and use of participant     | 14 |
| 52 | ancillary studies          |                      | data and biological specimens in ancillary studies, if applicable       |    |
| 53 |                            |                      |                                                                         |    |
| 54 |                            |                      |                                                                         |    |
| 55 | Confidentiality            | <a href="#">#27</a>  | How personal information about potential and enrolled participants      | 14 |
| 56 |                            |                      | will be collected, shared, and maintained in order to protect           |    |
| 57 |                            |                      | confidentiality before, during, and after the trial                     |    |
| 58 |                            |                      |                                                                         |    |
| 59 |                            |                      |                                                                         |    |
| 60 |                            |                      |                                                                         |    |

|    |                                             |                      |                                                                                                                                                                                                                                                                                     |    |
|----|---------------------------------------------|----------------------|-------------------------------------------------------------------------------------------------------------------------------------------------------------------------------------------------------------------------------------------------------------------------------------|----|
| 1  | Declaration of interests                    | <a href="#">#28</a>  | Financial and other competing interests for principal investigators for the overall trial and each study site                                                                                                                                                                       | 14 |
| 2  |                                             |                      |                                                                                                                                                                                                                                                                                     |    |
| 3  |                                             |                      |                                                                                                                                                                                                                                                                                     |    |
| 4  |                                             |                      |                                                                                                                                                                                                                                                                                     |    |
| 5  | Data access                                 | <a href="#">#29</a>  | Statement of who will have access to the final trial dataset, and disclosure of contractual agreements that limit such access for investigators                                                                                                                                     | 14 |
| 6  |                                             |                      |                                                                                                                                                                                                                                                                                     |    |
| 7  |                                             |                      |                                                                                                                                                                                                                                                                                     |    |
| 8  |                                             |                      |                                                                                                                                                                                                                                                                                     |    |
| 9  |                                             |                      |                                                                                                                                                                                                                                                                                     |    |
| 10 | Ancillary and post trial care               | <a href="#">#30</a>  | Provisions, if any, for ancillary and post-trial care, and for compensation to those who suffer harm from trial participation                                                                                                                                                       | 14 |
| 11 |                                             |                      |                                                                                                                                                                                                                                                                                     |    |
| 12 |                                             |                      |                                                                                                                                                                                                                                                                                     |    |
| 13 |                                             |                      |                                                                                                                                                                                                                                                                                     |    |
| 14 | Dissemination policy: trial results         | <a href="#">#31a</a> | Plans for investigators and sponsor to communicate trial results to participants, healthcare professionals, the public, and other relevant groups (eg, via publication, reporting in results databases, or other data sharing arrangements), including any publication restrictions | 14 |
| 15 |                                             |                      |                                                                                                                                                                                                                                                                                     |    |
| 16 |                                             |                      |                                                                                                                                                                                                                                                                                     |    |
| 17 |                                             |                      |                                                                                                                                                                                                                                                                                     |    |
| 18 |                                             |                      |                                                                                                                                                                                                                                                                                     |    |
| 19 |                                             |                      |                                                                                                                                                                                                                                                                                     |    |
| 20 |                                             |                      |                                                                                                                                                                                                                                                                                     |    |
| 21 | Dissemination policy: authorship            | <a href="#">#31b</a> | Authorship eligibility guidelines and any intended use of professional writers                                                                                                                                                                                                      | 14 |
| 22 |                                             |                      |                                                                                                                                                                                                                                                                                     |    |
| 23 |                                             |                      |                                                                                                                                                                                                                                                                                     |    |
| 24 | Dissemination policy: reproducible research | <a href="#">#31c</a> | Plans, if any, for granting public access to the full protocol, participant-level dataset, and statistical code                                                                                                                                                                     | 14 |
| 25 |                                             |                      |                                                                                                                                                                                                                                                                                     |    |
| 26 |                                             |                      |                                                                                                                                                                                                                                                                                     |    |
| 27 |                                             |                      |                                                                                                                                                                                                                                                                                     |    |
| 28 | <b>Appendices</b>                           |                      |                                                                                                                                                                                                                                                                                     |    |
| 29 |                                             |                      |                                                                                                                                                                                                                                                                                     |    |
| 30 |                                             |                      |                                                                                                                                                                                                                                                                                     |    |
| 31 | Informed consent materials                  | <a href="#">#32</a>  | Model consent form and other related documentation given to participants and authorised surrogates                                                                                                                                                                                  | 14 |
| 32 |                                             |                      |                                                                                                                                                                                                                                                                                     |    |
| 33 |                                             |                      |                                                                                                                                                                                                                                                                                     |    |
| 34 | Biological specimens                        | <a href="#">#33</a>  | Plans for collection, laboratory evaluation, and storage of biological specimens for genetic or molecular analysis in the current trial and for future use in ancillary studies, if applicable                                                                                      | 14 |
| 35 |                                             |                      |                                                                                                                                                                                                                                                                                     |    |
| 36 |                                             |                      |                                                                                                                                                                                                                                                                                     |    |
| 37 |                                             |                      |                                                                                                                                                                                                                                                                                     |    |
| 38 |                                             |                      |                                                                                                                                                                                                                                                                                     |    |
| 39 |                                             |                      |                                                                                                                                                                                                                                                                                     |    |

40 The SPIRIT checklist is distributed under the terms of the Creative Commons Attribution License CC-BY-ND  
 41 3.0. This checklist was completed on 30. June 2019 using <https://www.goodreports.org/>, a tool made by the  
 42 [EQUATOR Network](#) in collaboration with [Penelope.ai](#)  
 43  
 44  
 45  
 46  
 47  
 48  
 49  
 50  
 51  
 52  
 53  
 54  
 55  
 56  
 57  
 58  
 59  
 60

# BMJ Open

## Diagnostic Biomarkers for Adult Hemophagocytic Lymphohistiocytosis in Critically Ill Patients (HEMICU): Prospective Observational Study Protocol

|                               |                                                                                                                                                                                                                                                                                                                                                                                                                                                                                                                                                                                                                                                                                                                                                                                                                                                                                                                                                                                                                                                                                                                                                                                                                                                                                                                                                                                                                                                                                                                                                                                                                                                                                                                                                                                                                                                                                                                                                                                                                                                                                                                                                                                                                                                                                                       |
|-------------------------------|-------------------------------------------------------------------------------------------------------------------------------------------------------------------------------------------------------------------------------------------------------------------------------------------------------------------------------------------------------------------------------------------------------------------------------------------------------------------------------------------------------------------------------------------------------------------------------------------------------------------------------------------------------------------------------------------------------------------------------------------------------------------------------------------------------------------------------------------------------------------------------------------------------------------------------------------------------------------------------------------------------------------------------------------------------------------------------------------------------------------------------------------------------------------------------------------------------------------------------------------------------------------------------------------------------------------------------------------------------------------------------------------------------------------------------------------------------------------------------------------------------------------------------------------------------------------------------------------------------------------------------------------------------------------------------------------------------------------------------------------------------------------------------------------------------------------------------------------------------------------------------------------------------------------------------------------------------------------------------------------------------------------------------------------------------------------------------------------------------------------------------------------------------------------------------------------------------------------------------------------------------------------------------------------------------|
| Journal:                      | <i>BMJ Open</i>                                                                                                                                                                                                                                                                                                                                                                                                                                                                                                                                                                                                                                                                                                                                                                                                                                                                                                                                                                                                                                                                                                                                                                                                                                                                                                                                                                                                                                                                                                                                                                                                                                                                                                                                                                                                                                                                                                                                                                                                                                                                                                                                                                                                                                                                                       |
| Manuscript ID                 | bmjopen-2019-032695.R1                                                                                                                                                                                                                                                                                                                                                                                                                                                                                                                                                                                                                                                                                                                                                                                                                                                                                                                                                                                                                                                                                                                                                                                                                                                                                                                                                                                                                                                                                                                                                                                                                                                                                                                                                                                                                                                                                                                                                                                                                                                                                                                                                                                                                                                                                |
| Article Type:                 | Protocol                                                                                                                                                                                                                                                                                                                                                                                                                                                                                                                                                                                                                                                                                                                                                                                                                                                                                                                                                                                                                                                                                                                                                                                                                                                                                                                                                                                                                                                                                                                                                                                                                                                                                                                                                                                                                                                                                                                                                                                                                                                                                                                                                                                                                                                                                              |
| Date Submitted by the Author: | 19-Aug-2019                                                                                                                                                                                                                                                                                                                                                                                                                                                                                                                                                                                                                                                                                                                                                                                                                                                                                                                                                                                                                                                                                                                                                                                                                                                                                                                                                                                                                                                                                                                                                                                                                                                                                                                                                                                                                                                                                                                                                                                                                                                                                                                                                                                                                                                                                           |
| Complete List of Authors:     | <p>Lachmann, Gunnar; Charité Universitätsmedizin Berlin, Department of Anesthesiology and Operative Intensive Care Medicine<br/> Knaak, Cornelia; Charité Universitätsmedizin Berlin, Department of Anesthesiology and Operative Intensive Care Medicine<br/> von Haefen, Clarissa; Charité Universitätsmedizin Berlin, Department of Anesthesiology and Operative Intensive Care Medicine<br/> Paeschke, Nadine; Charité Universitätsmedizin Berlin, Department of Anesthesiology and Operative Intensive Care Medicine<br/> Meisel, Christian; Labor Berlin - Charité Vivantes GmbH, Department of Immunology<br/> Nyvlt, Peter; Charité Universitätsmedizin Berlin, Department of Anesthesiology and Operative Intensive Care Medicine<br/> Schuster, Friederike; Charité Universitätsmedizin Berlin, Department of Anesthesiology and Operative Intensive Care Medicine<br/> Piper, Sophie; Charité Universitätsmedizin Berlin, Institute of Biometry and Clinical Epidemiology<br/> Kruppa, Jochen; Charité - Universitätsmedizin Berlin, corporate member of Freie Universität Berlin, Humboldt-Universität zu Berlin and Berlin Institute of Health, Berlin, Germany , Institute of Biometry and Clinical Epidemiology<br/> Vorderwülbecke, Gerald; Charité Universitätsmedizin Berlin, Department of Anesthesiology and Operative Intensive Care Medicine<br/> Balzer, Felix; Charité Universitätsmedizin Berlin, Department of Anesthesiology and Operative Intensive Care Medicine<br/> La Roseé, Paul; Schwarzwald-Baar Klinikum Villingen-Schwenningen GmbH, Klinik für Innere Medizin II<br/> Schenk, Thomas; Universitätsklinikum Jena, Department of Hematology and Oncology<br/> Unterwalder, Nadine; Labor Berlin - Charité Vivantes GmbH, Department of Immunology<br/> Kölsch, Uwe; Labor Berlin - Charité Vivantes GmbH, Department of Immunology<br/> Lachmann, Nils; Charité Universitätsmedizin Berlin, Institute for Transfusion Medicine, H&amp;I Laboratory<br/> Akyüz, Levent; Charité Universitätsmedizin Berlin, Institute for Medical Immunology<br/> Brunkhorst, Frank; Universitätsklinikum Jena, Center for Clinical Studies, Department of Anesthesiology and Intensive Care Medicine<br/> Volk, Hans-Dieter; Charité Universitätsmedizin Berlin, Institute for</p> |

|                                      |                                                                                                                                                                                                                      |
|--------------------------------------|----------------------------------------------------------------------------------------------------------------------------------------------------------------------------------------------------------------------|
|                                      | Medical Immunology<br>Keh, Didier; Charité Universitätsmedizin Berlin, Department of<br>Anesthesiology and Operative Intensive Care Medicine<br>Spies, Claudia; Charité, Universitätsmedizin Berlin, Anaesthesiology |
| <b>Primary Subject<br/>Heading</b> : | Intensive care                                                                                                                                                                                                       |
| Secondary Subject Heading:           | Diagnostics, Gastroenterology and hepatology, Haematology (incl blood<br>transfusion), Immunology (including allergy), Rheumatology                                                                                  |
| Keywords:                            | Hemophagocytic Lymphohistiocytosis (HLH), Hemophagocytic syndrome<br>(HS), Macrophage activation syndrome (MAS), Sepsis, Biomarker,<br>Intensive Care Unit (ICU)                                                     |
|                                      |                                                                                                                                                                                                                      |

SCHOLARONE™  
Manuscripts

1  
2  
3  
4  
5  
6  
7  
8  
9  
10  
11  
12  
13  
14  
15  
16  
17  
18  
19  
20  
21  
22  
23  
24  
25  
26  
27  
28  
29  
30  
31  
32  
33  
34  
35  
36  
37  
38  
39  
40  
41  
42  
43  
44  
45  
46  
47  
48  
49  
50  
51  
52  
53  
54  
55  
56  
57  
58  
59  
60

# Diagnostic Biomarkers for Adult Hemophagocytic Lymphohistiocytosis in Critically Ill Patients (HEMICU): Prospective Observational Study Protocol

**Gunnar Lachmann<sup>1,2</sup>, Cornelia Knaak<sup>1</sup>, Clarissa von Haefen<sup>1</sup>, Nadine Paeschke<sup>1</sup>,  
Christian Meisel<sup>3</sup>, Peter Nyvlt<sup>1</sup>, Friederike S. Schuster<sup>1</sup>, Sophie K. Piper<sup>2,4</sup>,  
Jochen Kruppa<sup>2,4</sup>, Gerald Vorderwülbecke<sup>1</sup>, Felix Balzer<sup>1</sup>, Paul La Roseé<sup>5</sup>,  
Thomas Schenk<sup>6</sup>, Nadine Unterwalder<sup>3</sup>, Uwe Kölsch<sup>3</sup>, Nils Lachmann<sup>7</sup>, Levent  
Akyüz<sup>8</sup>, Frank M. Brunkhorst<sup>9</sup>, Hans-Dieter Volk<sup>8</sup>, Didier Keh<sup>1</sup>, Claudia Spies<sup>1</sup>**

<sup>1</sup>Department of Anesthesiology and Operative Intensive Care Medicine (CCM, CVK),  
Charité – Universitätsmedizin Berlin, corporate member of Freie Universität Berlin,  
Humboldt-Universität zu Berlin, and Berlin Institute of Health, Augustenburger Platz  
1, D-13353 Berlin, Germany

<sup>2</sup>Berlin Institute of Health (BIH), Anna-Louisa-Karsch-Str. 2, D-10178 Berlin,  
Germany

<sup>3</sup>Department of Immunology, Labor Berlin - Charité Vivantes GmbH, Sylter Strasse 2,  
13353 Berlin

<sup>4</sup>Institute of Biometry and Clinical Epidemiology, Charité – Universitätsmedizin Berlin,  
corporate member of Freie Universität Berlin, Humboldt-Universität zu Berlin, and  
Berlin Institute of Health, Charitéplatz 1, D-10117 Berlin, Germany

<sup>5</sup>Klinik für Innere Medizin II, Schwarzwald-Baar-Klinikum, Klinikstraße 11, D-78052  
Villingen-Schwenningen, Germany



1  
2  
3 <sup>6</sup>Department of Hematology and Oncology, Universitätsklinikum Jena,  
4 Am Klinikum 1, D-07747 Jena, Germany  
5  
6

7 <sup>7</sup>Institute for Transfusion Medicine, H&I Laboratory, Charité – Universitätsmedizin  
8 Berlin, Corporate Member of Freie Universität Berlin, Humboldt-Universität zu Berlin,  
9 and Berlin Institute of Health, Augustenburger Platz 1, D-13353 Berlin, Germany  
10  
11  
12

13 <sup>8</sup>Institute for Medical Immunology, Charité – Universitätsmedizin Berlin, Corporate  
14 Member of Freie Universität Berlin, Humboldt-Universität zu Berlin, and Berlin  
15 Institute of Health, Augustenburger Platz 1, D-13353 Berlin, Germany  
16  
17  
18

19 <sup>9</sup>Center for Clinical Studies, Department of Anesthesiology and Intensive Care  
20 Medicine, Universitätsklinikum Jena, Salvador-Allende-Platz 27, D-07747 Jena,  
21 Germany  
22  
23  
24  
25  
26  
27

28 Corresponding Author:

29 Dr. med. Gunnar Lachmann

30 Department of Anesthesiology and Operative Intensive Care Medicine (CCM, CVK)

31 Charité – Universitätsmedizin Berlin, corporate member of Freie Universität Berlin,

32 Humboldt-Universität zu Berlin, and Berlin Institute of Health

33 Augustenburger Platz 1, D-13353 Berlin, Germany  
34  
35  
36

37 Phone: +49 30 450 551 002

38 Fax: +49 30 450 551 909

39 Email: [gunnar.lachmann@charite.de](mailto:gunnar.lachmann@charite.de)  
40  
41  
42  
43  
44  
45  
46

47 **Word and Element Counts**

48 Abstract: 412

49 Introduction: 553

50 Discussion: 433

51 Figures: 1

52 Tables: 1  
53  
54  
55  
56  
57  
58  
59  
60

## Abstract

*Introduction:* Hemophagocytic Lymphohistiocytosis (HLH) in adults is characterized by toxic immune activation and a sepsis-like syndrome leading to high numbers of undiagnosed cases and mortality rates up to 68%. Early diagnosis and specific immune suppressive treatment is mandatory to avoid fatal outcome. Though, diagnostic criteria (HLH-2004) are adopted from pediatric HLH, and have not been validated in adults. Experimental studies suggest biomarkers to sufficiently diagnose HLH. However, investigation of biomarkers for diagnosis of adult HLH has not been labored, yet.

*Methods and analysis:* The Diagnostic Biomarkers for Adult Hemophagocytic Lymphohistiocytosis in Critically Ill Patients study (HEMICU) aims to estimate the incidence rate of adult HLH among suspected adult intensive care unit (ICU) patients. Screening for HLH will be performed in 16 ICUs of the Charité – Universitätsmedizin Berlin. Inclusion criteria are bicytopenia, hyperferritinemia ( $\geq 500 \mu\text{g/L}$ ), fever, or when HLH is suspected by the clinicians. Over a period of two years, we expect inclusion of about 100 patients with suspected HLH. HLH will be diagnosed if at least 5 HLH-2004 criteria are fulfilled together with an expert review, all other included patients will serve as controls. Secondly, a panel of potential biomarker candidates will be explored. DNA, plasma and serum will be stored in a biobank. Primary endpoint of the study is the incidence rate of adult HLH among suspected adult patients during ICU stay. Out of a variety of measured biomarkers, this study furthermore aims to find highly potential biomarkers for diagnosis of adult HLH in ICU. Results of this study will contribute to improved recognition and patient outcome of adult HLH in the clinical routine.

1  
2  
3 *Ethics and dissemination:* The institutional ethics committee approved this study on  
4  
5 August 1, 2018 (EA4/006/18). Results of the study will be disseminated in an  
6  
7 international peer-reviewed journal and presented at conferences.  
8

9  
10 *Trial registration:* The study was registered with clinicaltrials.gov (NCT03510650) on  
11  
12 April 27, 2018.  
13  
14

15  
16  
17 **Keywords:** Hemophagocytic Lymphohistiocytosis (HLH), Hemophagocytic syndrome  
18  
19 (HS), Macrophage activation syndrome (MAS), sepsis, biomarker, intensive care Unit  
20  
21 (ICU)  
22  
23  
24  
25  
26  
27

### 28 **Strengths and Limitations:**

29  
30  
31 - The HEMICU study is the first prospective study to investigate biomarkers for  
32  
33 diagnosis of adult HLH in ICU patients.

34  
35 - The variety of analyzed biomarkers will provide a better understanding of adult HLH  
36  
37 pathophysiology.

38  
39 - This study aims to investigate critically ill patients for adult HLH and estimate its  
40  
41 incidence rate among suspected patients during ICU stay.- Biobanking of DNA,  
42  
43 plasma and serum of adult HLH will generate a database to investigate future  
44  
45 research questions.

46  
47 - This study might be limited in that it only includes ICU patients and findings will not  
48  
49 be generalizable to non-ICU patients  
50  
51  
52  
53  
54  
55  
56  
57  
58  
59  
60

## Introduction

Hemophagocytic Lymphohistiocytosis (HLH) is a hyperinflammatory syndrome due to toxic immune activation associated with multiple organ failure and high mortality in intensive care unit (ICU) patients [1-3]. Primary HLH due to genetic causes has been subject of extensive research in pediatric medicine resulting in an advanced understanding of its pathophysiology including identification of underlying genetic defects related to cytotoxic granule exocytosis [4]. However, much less is known about HLH in adults where the secondary form triggered by infections, autoimmune diseases, malignancies or immunosuppressive therapy is more common. Both hereditary primary and reactive secondary HLH are characterized by impaired immune function, i.e. impaired natural-killer (NK) or cytotoxic-T-cell function leading to abnormal activation of cytokine-releasing macrophages and T-cells and finally to an uncontrolled inflammatory condition known as cytokine storm [5].

Currently, diagnosis is based on the HLH-2004 criteria (Table 1) derived from the pediatric HLH-2004 protocol which has not been validated in adult HLH patients [6, 7]. Moreover, diagnosis of HLH in ICU-admitted patients is hampered by its sepsis-like presentation. Clinical features include repetitive fever, hepato- and/or splenomegaly and antibiotic-refractory infections as well as pulmonary and renal involvement with consequent multiple organ failure [7]. Lab findings may reveal cytopenia, hypertriglyceridemia, ferritin  $\geq 500 \mu\text{g/L}$ , and hypofibrinogenemia. Timely diagnosis is crucial to initiate adequate treatment and thus to improve the prognosis. As demonstrated by Jordan et al. [8], early therapy reduces mortality to 30-35%. However, up to 78% of all HLH cases remain undiagnosed leading to mortality rates as high as 68% [2, 9]. Given the lack of specific diagnostic tests and the established use of invalidated diagnostic criteria in adults, we aim to identify a biomarker panel of high sensitivity and specificity to allow early detection of HLH in critically ill patients.

1  
2  
3  
4  
5  
6  
7  
8  
9  
10  
11  
12  
13  
14  
15  
16  
17  
18  
19  
20  
21  
22  
23  
24  
25  
26  
27  
28  
29  
30  
31  
32  
33  
34  
35  
36  
37  
38  
39  
40  
41  
42  
43  
44  
45  
46  
47  
48  
49  
50  
51  
52  
53  
54  
55  
56  
57  
58  
59  
60

For peer review only

## Methods and Analysis

### Design and screening

Over a two-year period (ongoing since 01/09/2018), screening of all patients admitted to 16 adult ICUs of the Charité - Universitätsmedizin Berlin will be performed. As part of the process, electronic patient charts will be screened daily for bicytopenia by an automated script. All patients with bicytopenia are daily searched by the study team for HLH-2004 criteria (Table 1), the HScore [10], and suspected HLH by the clinicians. If the patient is highly suspicious for HLH, patients will be enrolled after informed consent by the patient himself or the legal representative. Immediately after study enrolment and before initiation of specific HLH treatment, whole blood samples will be obtained for all analyses. Additionally, plasma and serum samples as well as DNA will be stored in a biobank (Figure 1). HLH will be diagnosed if at least 5 HLH-2004 criteria are fulfilled and finally be confirmed after a case-by-case review by two HLH experts. The study aims to include at least 100 patients with suspected HLH. Patients in whom HLH is not confirmed will serve as controls.

**Table 1. HLH-2004 diagnostic criteria [6]**

| <b>HLH-2004 diagnostic criteria of which at least 5 must be fulfilled</b>                                                           |
|-------------------------------------------------------------------------------------------------------------------------------------|
| Ferritin $\geq 500$ $\mu\text{g/L}$                                                                                                 |
| Fever ( $\geq 38.2$ $^{\circ}\text{C}$ )                                                                                            |
| Splenomegaly                                                                                                                        |
| Cytopenias in $\geq 2$ lines (Hemoglobin $< 9$ $\text{g/dL}$ , platelets $< 100$ $/\text{nL}$ , neutrophils $< 1.0$ $/\text{nL}$ )  |
| Hypertriglyceridemia and/or hypofibrinogenemia (fasting triglycerides $\geq 265$ $\text{mg/dL}$ , fibrinogen $< 1.5$ $\text{g/L}$ ) |
| Hemophagocytosis in bone marrow or spleen or lymph nodes                                                                            |

1  
2  
3 Low or absent NK activity

4  
5 Soluble CD25 (soluble IL-2 receptor (sIL-2R))  $\geq 2,400$  U/mL  
6  
7  
8

9  
10 Study Population and eligibility criteria for patients  
11  
12

13  
14 Inclusion criteria:

- 15  
16
- 17 • Intensive care patients of at least 18 years old
  - 18 • Suspected or diagnosed HLH: based on HLH-2004 diagnostic criteria  
19 (bicytopenia, hyperferritinemia ( $\geq 500 \mu\text{g/L}$ ), fever) or suspicion by the clinicians  
20  
21  
22  
23
  - 24 • Eligible to informed consent by the patient himself or the legal representative  
25  
26  
27

28  
29 Exclusion criteria:

- 30  
31
- 32 • Participation in an interventional study  
33  
34
  - 35 • Female patients with pregnancy or breastfeeding  
36  
37

38  
39  
40 Setting

41  
42 Participating ICU include anesthesiological, surgical, medical, neurological, and  
43 mixed ICUs. In total, 16 ICUs of the Charité – Universitätsmedizin Berlin will  
44 contribute patients.  
45  
46  
47  
48  
49

50  
51  
52  
53 Objectives and hypotheses

54  
55 This study aims to investigate critically ill patients for adult HLH and estimate its  
56 incidence rate among suspected patients during ICU stay. Secondly, a panel of  
57 various biomarkers candidates from experimental and pediatric studies will be  
58  
59  
60

1  
2  
3 measured to explore diagnostic potential to diagnose HLH in adult ICU-admitted  
4 patients. As a result, HLH might be detected earlier leading to an improved outcome.  
5  
6  
7 Highly sensitive biomarkers may also help to distinguish HLH from sepsis.  
8  
9

### 10 11 12 13 Patient and public involvement

14  
15 Patients or public were not involved in the development of the research question, the  
16 design, the recruitment and the conduct of this study. As a regular medical care, the  
17 results of the immunological analyses will be sent to the physicians in charge.  
18  
19  
20  
21  
22 Patients will be informed of the global results of the study at their request.  
23  
24  
25

### 26 27 28 Statistical analyses

29  
30 Incidence rate of HLH among suspected adult patient during ICU stay will be  
31 calculated with 95% confidence intervals. Investigation of potential biomarker will be  
32 exploratory. Descriptive statistics between patient groups with confirmed HLH and  
33 controls will incorporate mean and standard deviation or absolute and relative  
34 frequencies depending on each variable's scale. Uni- and multivariable logistic  
35 regression models with confirmed HLH diagnosis as outcome will be calculated for  
36 different combinations of influencing variables and biomarkers. Receiver operator  
37 characteristic (ROC) analysis will be performed to determine discrimination ability as  
38 measured by the area under the curve (AUC) for each continuous biomarker.  
39  
40 Sensitivity and specificity within our patient sample will be given for cut-off points with  
41 highest Youden index. Highly potential markers are found when sensitivity and  
42 specificity each reach 90%.  
43  
44  
45  
46  
47  
48  
49  
50  
51  
52  
53  
54  
55  
56  
57  
58  
59  
60



## Outcome measures

### Primary Endpoint

- Incidence rate of adult HLH among suspected patients during ICU stay

### Secondary Endpoints

- Identification of highly sensitive and highly specific biomarkers to safely diagnose adult HLH in ICU
- Trigger and underlying conditions
- Therapy of HLH by clinicians
- ICU and hospital length of stay
- Mortality and survival after 6 months
- Quality of life questionnaire 36-item short form health survey (SF-36) after 6 months [11]
- Human immunodeficiency virus (HIV) antibodies and -antigen
- Epstein Barr Virus (EBV) and Cytomegalovirus (CMV) viral loads
- Inflammatory markers (ferritin, C-reactive protein (CRP), procalcitonin (PCT), interleukin (IL)-1 $\beta$ , IL-2, IL-6, IL-8, IL-10, IL-18, IL-33, tumor necrosis factor (TNF)- $\alpha$ , interferon (IFN)- $\gamma$ , sCD25, sCD163, presepsin) [12]
- Perforin and CD107a [13]
- Fibrinogen, triglycerides, bilirubin, lactate dehydrogenase (LDH), liver transaminases (ALAT and ASAT)
- Sodium, serum albumin, serum protein electrophoresis
- Detailed immune status (differential blood count, T cells (CD3+), B cells (CD19+), NK cells (CD16+), T helper cells (CD4+), cytotoxic T cells (CD8+), CD4 / CD8 ratio, HLA-DR of CD8+, CD11a of CD8-, CD57 of CD8-, CD28 of CD8+, HLA-DR of monocytes, CD56bright and CD69 of NK cells)
- Glycosylated ferritin [14] and microRNAs (miR-205-5p, miR-194-5p and miR-30c-5p) [15]
- Chemokines CCL2 (MCP-1), CCL3, CCL4, CCL5 (RANTES), CCL11 (Eotaxin), CCL19, CCL20, CXCL1, CXCL9, CXCL8 (IL-8), CXCL10 (IP-10), CXCL12 (SDF1A) [16]
- HLA Typing

- Biobanking for future research questions (e.g. genetic polymorphisms and gene expression of PRF1, UNC13D, STX11, STXBP2 [7])

### Data collection

Number of screened patients, number of patients with suspected HLH who could not be included as well as data on all outcome measures will be collected prospectively.

If the patient received immunosuppressive therapy prior to inclusion, this will be documented separately. Further data including patient demographic data, past medical conditions, physicians' reports and routine laboratory results will be abstracted from the hospital's database. For follow-up six months after study inclusion, patients will be contacted either by telephone or by mail as indicated upon enrolment to assess health-related quality of life and mortality, respectively.

### Immunological measurements

Plasma concentrations of soluble IL-2R (sIL-2R or sCD25) will be determined with the IMMULITE™ semi-automatic chemiluminescent immunoassay (Siemens Healthcare GmbH, Erlangen, Germany). Additional soluble factors IL-1 $\beta$ , IL-2, IL-6, IL-8, IL-10, IL-18, IL-33, TNF- $\alpha$ , IFN- $\gamma$  will be measured by Meso Scale Discovery® (Meso Scale Diagnostics, Maryland USA). The kit provides all reagents, together with a 96-well plate with specific pre-coated spots, the detection antibodies and assay diluent. The standard will be reconstituted with assay diluent to obtain a lot specific concentration which differs for all cytokines. The vials are inverted multiple times for mixing and, after vortexing, the vials will be kept for 5–10 min at RT and then on ice until use. Preparation of further serial 1:5 dilution of Cytokine Standard is performed. Quality Controls (low and high) are components of the kits and respective Quality

1  
2  
3 Control ranges are provided by the manufacturer. The Quality Controls (low and high)  
4 will be reconstituted with 250 µl of deionized water. The vials are inverted multiple  
5 times for mixing and, after vortexing, kept for 5–10 min at RT and then on ice until  
6 use. Plasma concentrations of soluble CD163 protein levels from plasma will be  
7 determined with the Quantikine® ELISA human CD163 Immunoassay (R&D  
8 Systems, Minneapolis, USA). The minimum detectable dose ranged from 0.058-  
9 0.613 ng/mL. For measurement of presepsin, Presepsin (Human) ELISA Kit will be  
10 used (BioVision, California, USA) with a detection range of 0.156-10 ng/mL.

11  
12  
13  
14  
15  
16  
17  
18  
19  
20  
21  
22 Flow cytometric analysis of human lymphocyte subsets in EDTA whole blood will be  
23 performed, as described recently [17]. Briefly, the following mouse anti-human  
24 fluorescently-labelled monoclonal antibodies (mAb) are used for quantification of  
25 lymphocytes subsets and analysis of T and NK cell activation markers: cluster of  
26 differentiation (CD)3 Allophycocyanine-Alexa Fluor 750 (APC-A750), CD4 energy  
27 coupled dye (ECD), CD8 APC, CD11a Fluorescein isothiocyanate (FITC), CD14  
28 FITC, CD16 Phycoerythrine (PE), CD19 PE-Cy5.5, CD28 PC5, CD45 Krome-Orange  
29 (KrO), CD56 PE or CD56 APC, CD57 Pacific Blue (PB), CD69 PE, HLA-DR PE, (all  
30 from Beckman Coulter). Functional analysis of NK cells will be performed using the  
31 CD107a degranulation assay according to a protocol published by Bryceson et al.  
32 [18]. Briefly, peripheral blood mononuclear cells (PBMC) will be isolated by density  
33 gradient centrifugation and incubated overnight in the presence or absence of 3600  
34 IU/mL recombinant interleukin-2 (Peprotech). PBMC will then be incubated with the  
35 target cell line K562 (ATCC) in a 1:1 ratio for 3 hours. Subsequently, CD107a  
36 expression on NK cells is assessed by staining samples with fluorescently-labelled  
37 antibodies against lineage markers (see above) and an anti-CD107a FITC-labelled  
38 mAb (eBioscience). Perforin expression in NK cells will be assessed by intracellular  
39 staining in unstimulated NK cells using the PerFix-nc reagent (Beckman Coulter) for  
40  
41  
42  
43  
44  
45  
46  
47  
48  
49  
50  
51  
52  
53  
54  
55  
56  
57  
58  
59  
60

1  
2  
3 cell permeabilization and an APC-labelled anti-perforin mAb (eBioscience) according  
4  
5 the manufacturer's instructions.  
6  
7

8 Expression of human leukocyte antigen-DR (HLA-DR) on monocytes (mHLA-DR) will  
9  
10 be determined by flow cytometry using a highly standardized quantitative assay, as  
11  
12 described earlier [19]. In short, whole blood in Vacutainer tubes (BD Biosciences,  
13  
14 San Jose, CA, USA) containing EDTA are stained with 20 µl of monoclonal  
15  
16 phycoerythrin-conjugated anti-HLA-DR and PerCP-Cy5.5-conjugated anti-CD14  
17  
18 antibodies (Quantibrite HLA-DR/monocyte™; BD Biosciences) in the dark at room  
19  
20 temperature for 30 min. Erythrocyte lysis will be done with 0.5 mL of lysing solution  
21  
22 (BD Biosciences) for another 30 min at room temperature. Finally, the cells are  
23  
24 washed with 1 mL PBS buffer containing 2% FCS and analyzed on a Navios flow  
25  
26 cytometer (Beckman Coulter, Krefeld, Germany). HLA-DR surface expression on  
27  
28 monocytes will be calculated as monoclonal antibodies bound per cell (mAb/cell)  
29  
30 using the QuntiBRITE™ PE calibration beads. All flow cytometric analyses will be  
31  
32 performed on a ten-color Navios flow cytometer using the Navios Software (Beckman  
33  
34 Coulter). Human glycosylated ferritin will be determined by Enzyme-linked  
35  
36 Immunosorbent Assay (MyBioSource, San Diego, USA). The sensitivity of this kit is  
37  
38 2.0 ng/mL.  
39  
40  
41  
42  
43  
44  
45

46 The expression of miR-205-5p, miR-194-5p and miR-30c-5p will be determined in  
47  
48 whole blood, plasma and serum using a protocol published by Balcells et al. [20].  
49  
50 Briefly, after RNA isolation, miRNAs are polyadenylated and then reverse transcribed  
51  
52 with a special primer (RT-primer). For quantitative real time PCR (qPCR), two  
53  
54 specific primers for each miRNA are designed using a software tool from Busk [21].  
55  
56 All primers are tested for specificity and efficiency. The qPCR will be performed with  
57  
58 SYBR Green using the QuantStudio5® (Thermo Fisher, Darmstadt, Germany). The  
59  
60

1  
2  
3 quantification of chemokines involved in cell trafficking and effector functions of  
4 lymphocytes, granulocytes, and mononuclear cells from the CC subfamily (CCL2,  
5 CCL3, CCL4, CCL5, CCL11, CCL19, and CCL20) as well as the CXC subfamily  
6 (CXCL1, CXCL8 (IL-8), CXCL10, and CXCL12) will be performed with the  
7  
8 LUNARIS™ Human 11-Plex Chemokine Kit (AYOXXA Biosystems GmbH, Cologne,  
9 Germany).

10  
11  
12 Determination of human leukocyte antigen (HLA) typing will be performed by reverse  
13 sequence-specific oligonucleotide (rSSO) assay LABType® (One Lambda, Canoga  
14 Park, CA, USA). Typing will be assessed on an intermediate resolution level for HLA-  
15 A, -B, -C, -DRB1, -DQA1 and -DQB1. The assay will be performed according to the  
16 manufacturer's instructions and data will be acquired on a Luminex® FlexMAP 3D  
17 machine (Luminex, Austin, TX, USA).  
18  
19  
20  
21  
22  
23  
24  
25  
26  
27  
28  
29  
30  
31  
32  
33  
34

### 35 Informed consent in critically ill patients

36  
37 Written informed consent will be obtained from all patients or their legally authorized  
38 representatives. Consent for genetic analyzes in future projects will be obtained  
39 separately.  
40  
41  
42  
43  
44  
45  
46  
47

### 48 Sample size

49  
50 The true incidence of adult HLH in ICU is unknown. According to our own research  
51 [9] and the annual number of patients admitted to our ICU, we expect to see about  
52 200 patients with diagnosed HLH over two years, and about 400 with suspected  
53 HLH. Of these, we hope to include at least 100 patients with suspected HLH into the  
54 study, of whom about 50 patients are expected to be diagnosed with HLH. When the  
55  
56  
57  
58  
59  
60

1  
2  
3 sample size is 100, a two-sided 95.0% confidence interval for a single proportion  
4  
5 using the large sample normal approximation will extend 0.1 from the observed  
6  
7 proportion for an expected proportion of 0.5 (nQuery Advisor 7.0).  
8  
9  
10

## 11 12 13 Ethics and Dissemination

14  
15  
16 The institutional ethics committee approved this study on August 1, 2018  
17  
18 (EA4/006/18). The data protection commissioner also approved the study (91-SP-  
19  
20 18), which was registered with clinicaltrials.gov (NCT03510650) on April 27, 2018.  
21  
22 Results of the study will be disseminated in an international peer-reviewed journal  
23  
24 and presented at conferences.  
25  
26  
27  
28  
29  
30

## 31 Discussion

32  
33 HLH is a rare condition in adults with poor prognosis. Due to the paucity of data  
34  
35 available on adult HLH, recognition remains low resulting in delayed diagnosis and  
36  
37 treatment and finally, fatal outcome. This is the first prospective study to  
38  
39 systematically investigate routine and non-routine parameters for biomarker  
40  
41 development. Importantly, the daily systematic screening will help to identify HLH  
42  
43 patients at an early stage of the syndrome which ultimately will improve patient care,  
44  
45 patients' safety and outcome. Moreover, describing a distinct pattern of biomarkers  
46  
47 generates new hypothesis for future research thereby potentially providing targets for  
48  
49 therapy development. With regard to clinical practice, the HEMICU study seeks to  
50  
51 inform clinicians about HLH and ICU therapies to improve outcomes for HLH  
52  
53 patients. However, it is of note that this study does not seek to advice the clinician in  
54  
55 charge to change therapy. No change in routine management is intended due to the  
56  
57  
58  
59  
60

1  
2  
3 observational study design and final decisions are left to the discretion of the  
4  
5 responsible clinician.  
6  
7  
8  
9

## 10 11 Strengths and Limitations

12  
13 This study might be limited in that it only includes ICU patients and findings will not  
14  
15 be generalizable to non-ICU patients. In addition, patients might have developed  
16  
17 HLH before ICU admission and will thus be detected and measurements obtained at  
18  
19 an advanced stage of the disease possibly limiting comparability of the results.  
20  
21

22  
23 Moreover, we will not assess longitudinal parameters preventing us from describing  
24  
25 dynamics of biomarkers over time. However, as this study aims to develop a tool  
26  
27 facilitating diagnosis at the earliest possible time point, study endpoints will not be  
28  
29 affected by lack of repeated measurements. Possible advances of this study include  
30  
31 comprehensive lab testing of parameters, which have previously been suggested to  
32  
33 be associated with HLH [12-16]. Previous studies, most of which are retrospective in  
34  
35 nature, aimed at identifying associations to detect risk factors [2, 22]. Therefore, the  
36  
37 HEMICU study is the first prospective study of its kind.  
38  
39  
40  
41  
42  
43  
44

## 45 46 Conclusion

47  
48 HLH is a life threatening but poorly investigated condition in adult ICU patients. The  
49  
50 HEMICU study is the first prospective study in adult ICU patients and aims to  
51  
52 estimate the incidence rate of adult HLH among suspected patients during ICU stay.  
53  
54 Furthermore, we aim to investigate biomarkers for diagnosis of adult HLH in ICU  
55  
56 patients. Results of this study will contribute to improved recognition of adult HLH in  
57  
58 the clinical routine. Potentially earlier diagnosis and thus more effective treatment of  
59  
60 adult HLH could lead to improved patient outcome. Moreover, our study will provide a

1  
2  
3 better understanding of adult HLH pathophysiology and the biobanking of DNA,  
4  
5 plasma and serum will generate a database to investigate future research questions.  
6  
7  
8  
9

## 10 11 Acknowledgements

12  
13  
14 We thank the Department of Cardiovascular Surgery, the Department of Surgery  
15  
16 CCM/CVK, the Medical Department, Division of Nephrology and Internal Intensive  
17  
18 Care Medicine (CVK/CCM), the Medical Department, Division of Infectiology and  
19  
20 Pneumonology, the Medical Department, Division of Cardiology (CVK), the  
21  
22 Department of Cardiology (CBF), the Department of Neurology with Experimental  
23  
24 Neurology, and the Department of Anesthesiology and Operative Intensive Care  
25  
26 Medicine (CBF) for being part of our study and excellent collaboration. We also thank  
27  
28 the BIH Biobank Core Facility for support, coordination and storage of blood samples  
29  
30 (biobank). We are grateful to Dr. Kathrin Scholtz for monitoring the study.  
31  
32  
33  
34  
35  
36  
37  
38  
39  
40  
41  
42  
43  
44  
45  
46  
47  
48  
49  
50  
51  
52  
53  
54  
55  
56  
57  
58  
59  
60

## 40 Competing interests

41  
42 The authors declare no conflicts of interest.  
43  
44  
45  
46  
47  
48  
49  
50  
51  
52  
53  
54  
55  
56  
57  
58  
59  
60

## 48 References

1. Buyse, S., et al., *Critical care management of patients with hemophagocytic lymphohistiocytosis*. Intensive Care Med, 2010. **36**(10): p. 1695-702.
2. Barba, T., et al., *Hemophagocytic Lymphohistiocytosis in Intensive Care Unit: A 71-Case Strobe-Compliant Retrospective Study*. Medicine (Baltimore), 2015. **94**(51): p. e2318.
3. Lachmann, G., et al., *[Hemophagocytic lymphohistiocytosis : A diagnostic challenge on the ICU]*. Anaesthesist, 2016. **65**(10): p. 776-786.



- 1
- 2
- 3
4. Devitt, K., et al., *Hemophagocytic lymphohistiocytosis secondary to T-cell/histiocyte-rich large B-cell lymphoma*. *Leuk Res Rep*, 2014. **3**(2): p. 42-5.
5. Filipovich, A.H., *Hemophagocytic lymphohistiocytosis (HLH) and related disorders*. Hematology Am Soc Hematol Educ Program, 2009: p. 127-31.
6. Henter, J.I., et al., *HLH-2004: Diagnostic and therapeutic guidelines for hemophagocytic lymphohistiocytosis*. *Pediatr Blood Cancer*, 2007. **48**(2): p. 124-31.
7. Ramos-Casals, M., et al., *Adult haemophagocytic syndrome*. *Lancet*, 2014. **383**(9927): p. 1503-1516.
8. Jordan, M.B., et al., *How I treat hemophagocytic lymphohistiocytosis*. *Blood*, 2011. **118**(15): p. 4041-52.
9. Lachmann, G., et al., *Hemophagocytic Lymphohistiocytosis: Potentially Underdiagnosed in Intensive Care Units*. *Shock*, 2018. **50**(2): p. 149-155.
10. Fardet, L., et al., *Development and validation of the HScore, a score for the diagnosis of reactive hemophagocytic syndrome*. *Arthritis Rheumatol*, 2014. **66**(9): p. 2613-20.
11. Chrispin, P.S., et al., *Short Form 36 in the intensive care unit: assessment of acceptability, reliability and validity of the questionnaire*. *Anaesthesia*, 1997. **52**(1): p. 15-23.
12. Put, K., et al., *Cytokines in systemic juvenile idiopathic arthritis and haemophagocytic lymphohistiocytosis: tipping the balance between interleukin-18 and interferon-gamma*. *Rheumatology (Oxford)*, 2015. **54**(8): p. 1507-17.
13. Rubin, T.S., et al., *Perforin and CD107a testing is superior to NK cell function testing for screening patients for genetic HLH*. *Blood*, 2017. **129**(22): p. 2993-2999.
14. Nabergoj, M., et al., *Diagnostic and prognostic value of low percentage of glycosylated ferritin in acquired hemophagocytic lymphohistiocytosis: A single-center study*. *Int J Lab Hematol*, 2017. **39**(6): p. 620-624.
15. Bay, A., et al., *Evaluation of the plasma micro RNA expression levels in secondary hemophagocytic lymphohistiocytosis*. *Mediterr J Hematol Infect Dis*, 2013. **5**(1): p. e2013066.
16. Bracaglia, C., et al., *Elevated circulating levels of interferon-gamma and interferon-gamma-induced chemokines characterise patients with macrophage activation syndrome complicating systemic juvenile idiopathic arthritis*. *Ann Rheum Dis*, 2017. **76**(1): p. 166-172.
17. Klehmet, J., et al., *Circulating lymphocyte and T memory subsets in glucocorticosteroid versus IVIG treated patients with CIDP*. *J Neuroimmunol*, 2015. **283**: p. 17-22.
18. Bryceson, Y.T., et al., *A prospective evaluation of degranulation assays in the rapid diagnosis of familial hemophagocytic syndromes*. *Blood*, 2012. **119**(12): p. 2754-63.
19. Docke, W.D., et al., *Monitoring temporary immunodepression by flow cytometric measurement of monocytic HLA-DR expression: a multicenter standardized study*. *Clin Chem*, 2005. **51**(12): p. 2341-7.
20. Balcells, I., S. Cirera, and P.K. Busk, *Specific and sensitive quantitative RT-PCR of miRNAs with DNA primers*. *BMC Biotechnol*, 2011. **11**: p. 70.
21. Busk, P.K., *A tool for design of primers for microRNA-specific quantitative RT-qPCR*. *BMC Bioinformatics*, 2014. **15**: p. 29.
22. Ishii, E., et al., *Nationwide survey of hemophagocytic lymphohistiocytosis in Japan*. *Int J Hematol*, 2007. **86**(1): p. 58-65.

## Funding

Gunnar Lachmann is participant of the BIH Charité Clinician Scientist Program granted by the Charité – Universitätsmedizin Berlin and the Berlin Institute of Health (BIH). The study is supported by the Department of Anesthesiology and Operative Intensive Care Medicine (CCM, CVK), Charité – Universitätsmedizin Berlin.

## Authors' contributions

Study concept: GL. Conceived and designed the experiments: GL, CvH, NP, CM, PL, TS, NL, HDV, DK. Performing the experiments: GL, CK, CvH, NP, CM, PN, FSS, GV, FB, NU, UK, NL, LA. Analyzing the data: GL, CK, PN, FSS, SKP, JK, PL, TS. Wrote the manuscript: GL, CK, CvH, NP, CM, SKP, NL, LA, DK. Commented on the manuscript: all authors.

## Data statement

Due to legal restrictions imposed by the ethics committee of the Charité – Universitätsmedizin Berlin and the data protection commissioner of the Charité – Universitätsmedizin Berlin, public sharing of study data with other researchers or entities is not allowed. Requests may be sent to [dai-researchdata@charite.de](mailto:dai-researchdata@charite.de).

## Figure legends

Figure 1. Screening protocol and blood sampling.

1  
2  
3  
4  
5  
6  
7  
8  
9  
10  
11  
12  
13  
14  
15  
16  
17  
18  
19  
20  
21  
22  
23  
24  
25  
26  
27  
28  
29  
30  
31  
32  
33  
34  
35  
36  
37  
38  
39  
40  
41  
42  
43  
44  
45  
46  
47  
48  
49  
50  
51  
52  
53  
54  
55  
56  
57  
58  
59  
60

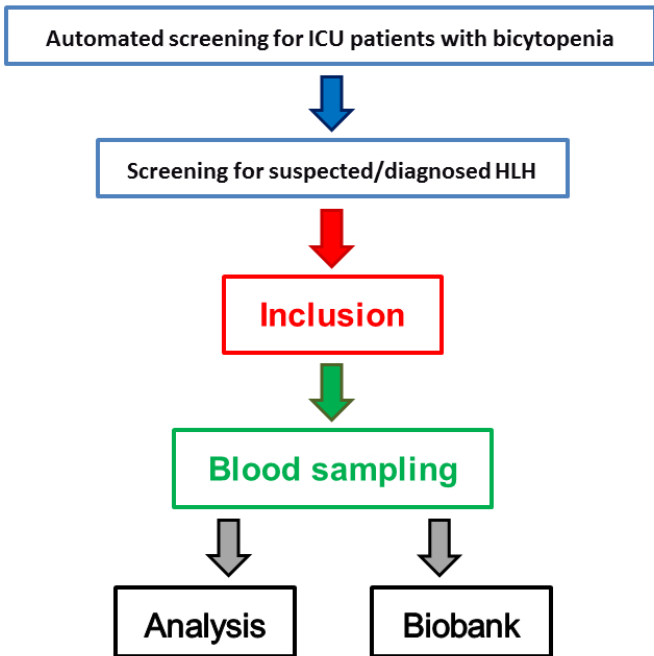

Figure 1 / Screening protocol and blood sampling.

81x60mm (300 x 300 DPI)

# Reporting checklist for protocol of a clinical trial.

Based on the SPIRIT guidelines.

## Instructions to authors

Complete this checklist by entering the page numbers from your manuscript where readers will find each of the items listed below.

Your article may not currently address all the items on the checklist. Please modify your text to include the missing information. If you are certain that an item does not apply, please write "n/a" and provide a short explanation.

Upload your completed checklist as an extra file when you submit to a journal.

In your methods section, say that you used the SPIRIT reporting guidelines, and cite them as:

Chan A-W, Tetzlaff JM, Altman DG, Laupacis A, Gøtzsche PC, Krleža-Jerić K, Hróbjartsson A, Mann H, Dickersin K, Berlin J, Doré C, Parulekar W, Summerskill W, Groves T, Schulz K, Sox H, Rockhold FW, Rennie D, Moher D. SPIRIT 2013 Statement: Defining standard protocol items for clinical trials. *Ann Intern Med.* 2013;158(3):200-207

|                                             |                     | Reporting Item                                                                                               | Page Number |
|---------------------------------------------|---------------------|--------------------------------------------------------------------------------------------------------------|-------------|
| <b>Administrative information</b>           |                     |                                                                                                              |             |
| Title                                       | <a href="#">#1</a>  | Descriptive title identifying the study design, population, interventions, and, if applicable, trial acronym | 1           |
| Trial registration                          | <a href="#">#2a</a> | Trial identifier and registry name. If not yet registered, name of intended registry                         | 14          |
| Trial registration: data set                | <a href="#">#2b</a> | All items from the World Health Organization Trial Registration Data Set                                     | 14          |
| Protocol version                            | <a href="#">#3</a>  | Date and version identifier                                                                                  | 14          |
| Funding                                     | <a href="#">#4</a>  | Sources and types of financial, material, and other support                                                  | 16          |
| Roles and responsibilities: contributorship | <a href="#">#5a</a> | Names, affiliations, and roles of protocol contributors                                                      | 1           |

|    |                           |                     |                                                                      |    |
|----|---------------------------|---------------------|----------------------------------------------------------------------|----|
| 1  | Roles and                 | <a href="#">#5b</a> | Name and contact information for the trial sponsor                   | 16 |
| 2  | responsibilities:         |                     |                                                                      |    |
| 3  | sponsor contact           |                     |                                                                      |    |
| 4  | information               |                     |                                                                      |    |
| 5  |                           |                     |                                                                      |    |
| 6  |                           |                     |                                                                      |    |
| 7  |                           |                     |                                                                      |    |
| 8  | Roles and                 | <a href="#">#5c</a> | Role of study sponsor and funders, if any, in study design;          | 16 |
| 9  | responsibilities:         |                     | collection, management, analysis, and interpretation of data;        |    |
| 10 | sponsor and funder        |                     | writing of the report; and the decision to submit the report for     |    |
| 11 |                           |                     | publication, including whether they will have ultimate authority     |    |
| 12 |                           |                     | over any of these activities                                         |    |
| 13 |                           |                     |                                                                      |    |
| 14 |                           |                     |                                                                      |    |
| 15 |                           |                     |                                                                      |    |
| 16 | Roles and                 | <a href="#">#5d</a> | Composition, roles, and responsibilities of the coordinating centre, | 16 |
| 17 | responsibilities:         |                     | steering committee, endpoint adjudication committee, data            |    |
| 18 | committees                |                     | management team, and other individuals or groups overseeing the      |    |
| 19 |                           |                     | trial, if applicable (see Item 21a for data monitoring committee)    |    |
| 20 |                           |                     |                                                                      |    |
| 21 |                           |                     |                                                                      |    |
| 22 |                           |                     |                                                                      |    |
| 23 | <b>Introduction</b>       |                     |                                                                      |    |
| 24 |                           |                     |                                                                      |    |
| 25 | Background and            | <a href="#">#6a</a> | Description of research question and justification for undertaking   | 5  |
| 26 | rationale                 |                     | the trial, including summary of relevant studies (published and      |    |
| 27 |                           |                     | unpublished) examining benefits and harms for each intervention      |    |
| 28 |                           |                     |                                                                      |    |
| 29 |                           |                     |                                                                      |    |
| 30 | Background and            | <a href="#">#6b</a> | Explanation for choice of comparators                                | 5  |
| 31 | rationale: choice of      |                     |                                                                      |    |
| 32 | comparators               |                     |                                                                      |    |
| 33 |                           |                     |                                                                      |    |
| 34 |                           |                     |                                                                      |    |
| 35 |                           |                     |                                                                      |    |
| 36 | Objectives                | <a href="#">#7</a>  | Specific objectives or hypotheses                                    | 5  |
| 37 |                           |                     |                                                                      |    |
| 38 | Trial design              | <a href="#">#8</a>  | Description of trial design including type of trial (eg, parallel    | 7  |
| 39 |                           |                     | group, crossover, factorial, single group), allocation ratio, and    |    |
| 40 |                           |                     | framework (eg, superiority, equivalence, non-inferiority,            |    |
| 41 |                           |                     | exploratory)                                                         |    |
| 42 |                           |                     |                                                                      |    |
| 43 |                           |                     |                                                                      |    |
| 44 |                           |                     |                                                                      |    |
| 45 | <b>Methods:</b>           |                     |                                                                      |    |
| 46 | <b>Participants,</b>      |                     |                                                                      |    |
| 47 | <b>interventions, and</b> |                     |                                                                      |    |
| 48 | <b>outcomes</b>           |                     |                                                                      |    |
| 49 |                           |                     |                                                                      |    |
| 50 |                           |                     |                                                                      |    |
| 51 | Study setting             | <a href="#">#9</a>  | Description of study settings (eg, community clinic, academic        | 7  |
| 52 |                           |                     | hospital) and list of countries where data will be collected.        |    |
| 53 |                           |                     | Reference to where list of study sites can be obtained               |    |
| 54 |                           |                     |                                                                      |    |
| 55 |                           |                     |                                                                      |    |
| 56 |                           |                     |                                                                      |    |
| 57 | Eligibility criteria      | <a href="#">#10</a> | Inclusion and exclusion criteria for participants. If applicable,    | 8  |
| 58 |                           |                     | eligibility criteria for study centres and individuals who will      |    |
| 59 |                           |                     |                                                                      |    |
| 60 |                           |                     |                                                                      |    |

perform the interventions (eg, surgeons, psychotherapists)

|    |                      |                      |                                                                       |
|----|----------------------|----------------------|-----------------------------------------------------------------------|
| 1  |                      |                      |                                                                       |
| 2  |                      |                      |                                                                       |
| 3  | Interventions:       | <a href="#">#11a</a> | Interventions for each group with sufficient detail to allow          |
| 4  | description          |                      | replication, including how and when they will be administered         |
| 5  |                      |                      |                                                                       |
| 6  | Interventions:       | <a href="#">#11b</a> | Criteria for discontinuing or modifying allocated interventions for a |
| 7  | modifications        |                      | given trial participant (eg, drug dose change in response to harms,   |
| 8  |                      |                      | participant request, or improving / worsening disease)                |
| 9  |                      |                      |                                                                       |
| 10 |                      |                      |                                                                       |
| 11 | Interventions:       | <a href="#">#11c</a> | Strategies to improve adherence to intervention protocols, and any    |
| 12 | adherence            |                      | procedures for monitoring adherence (eg, drug tablet return;          |
| 13 |                      |                      | laboratory tests)                                                     |
| 14 |                      |                      |                                                                       |
| 15 |                      |                      |                                                                       |
| 16 | Interventions:       | <a href="#">#11d</a> | Relevant concomitant care and interventions that are permitted or     |
| 17 | concomitant care     |                      | prohibited during the trial                                           |
| 18 |                      |                      |                                                                       |
| 19 |                      |                      |                                                                       |
| 20 |                      |                      |                                                                       |
| 21 | Outcomes             | <a href="#">#12</a>  | Primary, secondary, and other outcomes, including the specific        |
| 22 |                      |                      | measurement variable (eg, systolic blood pressure), analysis metric   |
| 23 |                      |                      | (eg, change from baseline, final value, time to event), method of     |
| 24 |                      |                      | aggregation (eg, median, proportion), and time point for each         |
| 25 |                      |                      | outcome. Explanation of the clinical relevance of chosen efficacy     |
| 26 |                      |                      | and harm outcomes is strongly recommended                             |
| 27 |                      |                      |                                                                       |
| 28 |                      |                      |                                                                       |
| 29 |                      |                      |                                                                       |
| 30 | Participant timeline | <a href="#">#13</a>  | Time schedule of enrolment, interventions (including any run-ins      |
| 31 |                      |                      | and washouts), assessments, and visits for participants. A            |
| 32 |                      |                      | schematic diagram is highly recommended (see Figure)                  |
| 33 |                      |                      |                                                                       |
| 34 |                      |                      |                                                                       |
| 35 |                      |                      |                                                                       |
| 36 | Sample size          | <a href="#">#14</a>  | Estimated number of participants needed to achieve study              |
| 37 |                      |                      | objectives and how it was determined, including clinical and          |
| 38 |                      |                      | statistical assumptions supporting any sample size calculations       |
| 39 |                      |                      |                                                                       |
| 40 |                      |                      |                                                                       |
| 41 | Recruitment          | <a href="#">#15</a>  | Strategies for achieving adequate participant enrolment to reach      |
| 42 |                      |                      | target sample size                                                    |
| 43 |                      |                      |                                                                       |
| 44 |                      |                      |                                                                       |

**Methods: Assignment  
of interventions (for  
controlled trials)**

|    |                      |                      |                                                                      |
|----|----------------------|----------------------|----------------------------------------------------------------------|
| 45 |                      |                      |                                                                      |
| 46 |                      |                      |                                                                      |
| 47 |                      |                      |                                                                      |
| 48 |                      |                      |                                                                      |
| 49 |                      |                      |                                                                      |
| 50 | Allocation: sequence | <a href="#">#16a</a> | Method of generating the allocation sequence (eg, computer-          |
| 51 | generation           |                      | generated random numbers), and list of any factors for               |
| 52 |                      |                      | stratification. To reduce predictability of a random sequence,       |
| 53 |                      |                      | details of any planned restriction (eg, blocking) should be provided |
| 54 |                      |                      | in a separate document that is unavailable to those who enrol        |
| 55 |                      |                      | participants or assign interventions                                 |
| 56 |                      |                      |                                                                      |
| 57 |                      |                      |                                                                      |
| 58 |                      |                      |                                                                      |
| 59 |                      |                      |                                                                      |
| 60 |                      |                      |                                                                      |

|    |                        |                      |                                                                       |   |
|----|------------------------|----------------------|-----------------------------------------------------------------------|---|
| 1  | Allocation concealment | <a href="#">#16b</a> | Mechanism of implementing the allocation sequence (eg, central        | 7 |
| 2  | mechanism              |                      | telephone; sequentially numbered, opaque, sealed envelopes),          |   |
| 3  |                        |                      | describing any steps to conceal the sequence until interventions are  |   |
| 4  |                        |                      | assigned                                                              |   |
| 5  |                        |                      |                                                                       |   |
| 6  |                        |                      |                                                                       |   |
| 7  |                        |                      |                                                                       |   |
| 8  | Allocation:            | <a href="#">#16c</a> | Who will generate the allocation sequence, who will enrol             | 7 |
| 9  | implementation         |                      | participants, and who will assign participants to interventions       |   |
| 10 |                        |                      |                                                                       |   |
| 11 | Blinding (masking)     | <a href="#">#17a</a> | Who will be blinded after assignment to interventions (eg, trial      | 7 |
| 12 |                        |                      | participants, care providers, outcome assessors, data analysts), and  |   |
| 13 |                        |                      | how                                                                   |   |
| 14 |                        |                      |                                                                       |   |
| 15 |                        |                      |                                                                       |   |
| 16 |                        |                      |                                                                       |   |
| 17 | Blinding (masking):    | <a href="#">#17b</a> | If blinded, circumstances under which unblinding is permissible,      | 7 |
| 18 | emergency unblinding   |                      | and procedure for revealing a participant's allocated intervention    |   |
| 19 |                        |                      | during the trial                                                      |   |
| 20 |                        |                      |                                                                       |   |
| 21 |                        |                      |                                                                       |   |
| 22 | <b>Methods: Data</b>   |                      |                                                                       |   |
| 23 | <b>collection,</b>     |                      |                                                                       |   |
| 24 | <b>management, and</b> |                      |                                                                       |   |
| 25 | <b>analysis</b>        |                      |                                                                       |   |
| 26 |                        |                      |                                                                       |   |
| 27 |                        |                      |                                                                       |   |
| 28 |                        |                      |                                                                       |   |
| 29 | Data collection plan   | <a href="#">#18a</a> | Plans for assessment and collection of outcome, baseline, and other   | 7 |
| 30 |                        |                      | trial data, including any related processes to promote data quality   |   |
| 31 |                        |                      | (eg, duplicate measurements, training of assessors) and a             |   |
| 32 |                        |                      | description of study instruments (eg, questionnaires, laboratory      |   |
| 33 |                        |                      | tests) along with their reliability and validity, if known. Reference |   |
| 34 |                        |                      | to where data collection forms can be found, if not in the protocol   |   |
| 35 |                        |                      |                                                                       |   |
| 36 |                        |                      |                                                                       |   |
| 37 |                        |                      |                                                                       |   |
| 38 |                        |                      |                                                                       |   |
| 39 | Data collection plan:  | <a href="#">#18b</a> | Plans to promote participant retention and complete follow-up,        | 7 |
| 40 | retention              |                      | including list of any outcome data to be collected for participants   |   |
| 41 |                        |                      | who discontinue or deviate from intervention protocols                |   |
| 42 |                        |                      |                                                                       |   |
| 43 |                        |                      |                                                                       |   |
| 44 | Data management        | <a href="#">#19</a>  | Plans for data entry, coding, security, and storage, including any    | 7 |
| 45 |                        |                      | related processes to promote data quality (eg, double data entry;     |   |
| 46 |                        |                      | range checks for data values). Reference to where details of data     |   |
| 47 |                        |                      | management procedures can be found, if not in the protocol            |   |
| 48 |                        |                      |                                                                       |   |
| 49 |                        |                      |                                                                       |   |
| 50 |                        |                      |                                                                       |   |
| 51 | Statistics: outcomes   | <a href="#">#20a</a> | Statistical methods for analysing primary and secondary outcomes.     | 9 |
| 52 |                        |                      | Reference to where other details of the statistical analysis plan can |   |
| 53 |                        |                      | be found, if not in the protocol                                      |   |
| 54 |                        |                      |                                                                       |   |
| 55 |                        |                      |                                                                       |   |
| 56 | Statistics: additional | <a href="#">#20b</a> | Methods for any additional analyses (eg, subgroup and adjusted        | 9 |
| 57 | analyses               |                      | analyses)                                                             |   |
| 58 |                        |                      |                                                                       |   |
| 59 |                        |                      |                                                                       |   |
| 60 |                        |                      |                                                                       |   |

|    |                            |                      |                                                                         |    |
|----|----------------------------|----------------------|-------------------------------------------------------------------------|----|
| 1  | Statistics: analysis       | <a href="#">#20c</a> | Definition of analysis population relating to protocol non-             | 9  |
| 2  | population and missing     |                      | adherence (eg, as randomised analysis), and any statistical methods     |    |
| 3  | data                       |                      | to handle missing data (eg, multiple imputation)                        |    |
| 4  |                            |                      |                                                                         |    |
| 5  |                            |                      |                                                                         |    |
| 6  | <b>Methods: Monitoring</b> |                      |                                                                         |    |
| 7  |                            |                      |                                                                         |    |
| 8  | Data monitoring:           | <a href="#">#21a</a> | Composition of data monitoring committee (DMC); summary of its          | 7  |
| 9  | formal committee           |                      | role and reporting structure; statement of whether it is independent    |    |
| 10 |                            |                      | from the sponsor and competing interests; and reference to where        |    |
| 11 |                            |                      | further details about its charter can be found, if not in the protocol. |    |
| 12 |                            |                      | Alternatively, an explanation of why a DMC is not needed                |    |
| 13 |                            |                      |                                                                         |    |
| 14 |                            |                      |                                                                         |    |
| 15 |                            |                      |                                                                         |    |
| 16 |                            |                      |                                                                         |    |
| 17 | Data monitoring:           | <a href="#">#21b</a> | Description of any interim analyses and stopping guidelines,            | 7  |
| 18 | interim analysis           |                      | including who will have access to these interim results and make        |    |
| 19 |                            |                      | the final decision to terminate the trial                               |    |
| 20 |                            |                      |                                                                         |    |
| 21 |                            |                      |                                                                         |    |
| 22 | Harms                      | <a href="#">#22</a>  | Plans for collecting, assessing, reporting, and managing solicited      | 7  |
| 23 |                            |                      | and spontaneously reported adverse events and other unintended          |    |
| 24 |                            |                      | effects of trial interventions or trial conduct                         |    |
| 25 |                            |                      |                                                                         |    |
| 26 |                            |                      |                                                                         |    |
| 27 | Auditing                   | <a href="#">#23</a>  | Frequency and procedures for auditing trial conduct, if any, and        | 7  |
| 28 |                            |                      | whether the process will be independent from investigators and the      |    |
| 29 |                            |                      | sponsor                                                                 |    |
| 30 |                            |                      |                                                                         |    |
| 31 |                            |                      |                                                                         |    |
| 32 |                            |                      |                                                                         |    |
| 33 | <b>Ethics and</b>          |                      |                                                                         |    |
| 34 | <b>dissemination</b>       |                      |                                                                         |    |
| 35 |                            |                      |                                                                         |    |
| 36 |                            |                      |                                                                         |    |
| 37 | Research ethics            | <a href="#">#24</a>  | Plans for seeking research ethics committee / institutional review      | 14 |
| 38 | approval                   |                      | board (REC / IRB) approval                                              |    |
| 39 |                            |                      |                                                                         |    |
| 40 |                            |                      |                                                                         |    |
| 41 | Protocol amendments        | <a href="#">#25</a>  | Plans for communicating important protocol modifications (eg,           | 14 |
| 42 |                            |                      | changes to eligibility criteria, outcomes, analyses) to relevant        |    |
| 43 |                            |                      | parties (eg, investigators, REC / IRBs, trial participants, trial       |    |
| 44 |                            |                      | registries, journals, regulators)                                       |    |
| 45 |                            |                      |                                                                         |    |
| 46 |                            |                      |                                                                         |    |
| 47 | Consent or assent          | <a href="#">#26a</a> | Who will obtain informed consent or assent from potential trial         | 14 |
| 48 |                            |                      | participants or authorised surrogates, and how (see Item 32)            |    |
| 49 |                            |                      |                                                                         |    |
| 50 |                            |                      |                                                                         |    |
| 51 | Consent or assent:         | <a href="#">#26b</a> | Additional consent provisions for collection and use of participant     | 14 |
| 52 | ancillary studies          |                      | data and biological specimens in ancillary studies, if applicable       |    |
| 53 |                            |                      |                                                                         |    |
| 54 |                            |                      |                                                                         |    |
| 55 | Confidentiality            | <a href="#">#27</a>  | How personal information about potential and enrolled participants      | 14 |
| 56 |                            |                      | will be collected, shared, and maintained in order to protect           |    |
| 57 |                            |                      | confidentiality before, during, and after the trial                     |    |
| 58 |                            |                      |                                                                         |    |
| 59 |                            |                      |                                                                         |    |
| 60 |                            |                      |                                                                         |    |



|    |                                             |                      |                                                                                                                                                                                                                                                                                     |    |
|----|---------------------------------------------|----------------------|-------------------------------------------------------------------------------------------------------------------------------------------------------------------------------------------------------------------------------------------------------------------------------------|----|
| 1  | Declaration of interests                    | <a href="#">#28</a>  | Financial and other competing interests for principal investigators for the overall trial and each study site                                                                                                                                                                       | 14 |
| 2  |                                             |                      |                                                                                                                                                                                                                                                                                     |    |
| 3  |                                             |                      |                                                                                                                                                                                                                                                                                     |    |
| 4  |                                             |                      |                                                                                                                                                                                                                                                                                     |    |
| 5  | Data access                                 | <a href="#">#29</a>  | Statement of who will have access to the final trial dataset, and disclosure of contractual agreements that limit such access for investigators                                                                                                                                     | 14 |
| 6  |                                             |                      |                                                                                                                                                                                                                                                                                     |    |
| 7  |                                             |                      |                                                                                                                                                                                                                                                                                     |    |
| 8  |                                             |                      |                                                                                                                                                                                                                                                                                     |    |
| 9  |                                             |                      |                                                                                                                                                                                                                                                                                     |    |
| 10 | Ancillary and post trial care               | <a href="#">#30</a>  | Provisions, if any, for ancillary and post-trial care, and for compensation to those who suffer harm from trial participation                                                                                                                                                       | 14 |
| 11 |                                             |                      |                                                                                                                                                                                                                                                                                     |    |
| 12 |                                             |                      |                                                                                                                                                                                                                                                                                     |    |
| 13 |                                             |                      |                                                                                                                                                                                                                                                                                     |    |
| 14 | Dissemination policy: trial results         | <a href="#">#31a</a> | Plans for investigators and sponsor to communicate trial results to participants, healthcare professionals, the public, and other relevant groups (eg, via publication, reporting in results databases, or other data sharing arrangements), including any publication restrictions | 14 |
| 15 |                                             |                      |                                                                                                                                                                                                                                                                                     |    |
| 16 |                                             |                      |                                                                                                                                                                                                                                                                                     |    |
| 17 |                                             |                      |                                                                                                                                                                                                                                                                                     |    |
| 18 |                                             |                      |                                                                                                                                                                                                                                                                                     |    |
| 19 |                                             |                      |                                                                                                                                                                                                                                                                                     |    |
| 20 |                                             |                      |                                                                                                                                                                                                                                                                                     |    |
| 21 | Dissemination policy: authorship            | <a href="#">#31b</a> | Authorship eligibility guidelines and any intended use of professional writers                                                                                                                                                                                                      | 14 |
| 22 |                                             |                      |                                                                                                                                                                                                                                                                                     |    |
| 23 |                                             |                      |                                                                                                                                                                                                                                                                                     |    |
| 24 | Dissemination policy: reproducible research | <a href="#">#31c</a> | Plans, if any, for granting public access to the full protocol, participant-level dataset, and statistical code                                                                                                                                                                     | 14 |
| 25 |                                             |                      |                                                                                                                                                                                                                                                                                     |    |
| 26 |                                             |                      |                                                                                                                                                                                                                                                                                     |    |
| 27 |                                             |                      |                                                                                                                                                                                                                                                                                     |    |
| 28 | <b>Appendices</b>                           |                      |                                                                                                                                                                                                                                                                                     |    |
| 29 |                                             |                      |                                                                                                                                                                                                                                                                                     |    |
| 30 |                                             |                      |                                                                                                                                                                                                                                                                                     |    |
| 31 | Informed consent materials                  | <a href="#">#32</a>  | Model consent form and other related documentation given to participants and authorised surrogates                                                                                                                                                                                  | 14 |
| 32 |                                             |                      |                                                                                                                                                                                                                                                                                     |    |
| 33 |                                             |                      |                                                                                                                                                                                                                                                                                     |    |
| 34 |                                             |                      |                                                                                                                                                                                                                                                                                     |    |
| 35 | Biological specimens                        | <a href="#">#33</a>  | Plans for collection, laboratory evaluation, and storage of biological specimens for genetic or molecular analysis in the current trial and for future use in ancillary studies, if applicable                                                                                      | 14 |
| 36 |                                             |                      |                                                                                                                                                                                                                                                                                     |    |
| 37 |                                             |                      |                                                                                                                                                                                                                                                                                     |    |
| 38 |                                             |                      |                                                                                                                                                                                                                                                                                     |    |
| 39 |                                             |                      |                                                                                                                                                                                                                                                                                     |    |

40 The SPIRIT checklist is distributed under the terms of the Creative Commons Attribution License CC-BY-ND  
 41 3.0. This checklist was completed on 30. June 2019 using <https://www.goodreports.org/>, a tool made by the  
 42 [EQUATOR Network](#) in collaboration with [Penelope.ai](#)  
 43  
 44  
 45  
 46  
 47  
 48  
 49  
 50  
 51  
 52  
 53  
 54  
 55  
 56  
 57  
 58  
 59  
 60

# BMJ Open

## Diagnostic Biomarkers for Adult Hemophagocytic Lymphohistiocytosis in Critically Ill Patients (HEMICU): Prospective Observational Study Protocol

|                               |                                                                                                                                                                                                                                                                                                                                                                                                                                                                                                                                                                                                                                                                                                                                                                                                                                                                                                                                                                                                                                                                                                                                                                                                                                                                                                                                                                                                                                                                                                                                                                                                                                                                                                                                                                                                                                                                                                                                                                                                                                                                                                                                                                                                                                                                                                       |
|-------------------------------|-------------------------------------------------------------------------------------------------------------------------------------------------------------------------------------------------------------------------------------------------------------------------------------------------------------------------------------------------------------------------------------------------------------------------------------------------------------------------------------------------------------------------------------------------------------------------------------------------------------------------------------------------------------------------------------------------------------------------------------------------------------------------------------------------------------------------------------------------------------------------------------------------------------------------------------------------------------------------------------------------------------------------------------------------------------------------------------------------------------------------------------------------------------------------------------------------------------------------------------------------------------------------------------------------------------------------------------------------------------------------------------------------------------------------------------------------------------------------------------------------------------------------------------------------------------------------------------------------------------------------------------------------------------------------------------------------------------------------------------------------------------------------------------------------------------------------------------------------------------------------------------------------------------------------------------------------------------------------------------------------------------------------------------------------------------------------------------------------------------------------------------------------------------------------------------------------------------------------------------------------------------------------------------------------------|
| Journal:                      | <i>BMJ Open</i>                                                                                                                                                                                                                                                                                                                                                                                                                                                                                                                                                                                                                                                                                                                                                                                                                                                                                                                                                                                                                                                                                                                                                                                                                                                                                                                                                                                                                                                                                                                                                                                                                                                                                                                                                                                                                                                                                                                                                                                                                                                                                                                                                                                                                                                                                       |
| Manuscript ID                 | bmjopen-2019-032695.R2                                                                                                                                                                                                                                                                                                                                                                                                                                                                                                                                                                                                                                                                                                                                                                                                                                                                                                                                                                                                                                                                                                                                                                                                                                                                                                                                                                                                                                                                                                                                                                                                                                                                                                                                                                                                                                                                                                                                                                                                                                                                                                                                                                                                                                                                                |
| Article Type:                 | Protocol                                                                                                                                                                                                                                                                                                                                                                                                                                                                                                                                                                                                                                                                                                                                                                                                                                                                                                                                                                                                                                                                                                                                                                                                                                                                                                                                                                                                                                                                                                                                                                                                                                                                                                                                                                                                                                                                                                                                                                                                                                                                                                                                                                                                                                                                                              |
| Date Submitted by the Author: | 23-Sep-2019                                                                                                                                                                                                                                                                                                                                                                                                                                                                                                                                                                                                                                                                                                                                                                                                                                                                                                                                                                                                                                                                                                                                                                                                                                                                                                                                                                                                                                                                                                                                                                                                                                                                                                                                                                                                                                                                                                                                                                                                                                                                                                                                                                                                                                                                                           |
| Complete List of Authors:     | <p>Lachmann, Gunnar; Charité Universitätsmedizin Berlin, Department of Anesthesiology and Operative Intensive Care Medicine<br/> Knaak, Cornelia; Charité Universitätsmedizin Berlin, Department of Anesthesiology and Operative Intensive Care Medicine<br/> von Haefen, Clarissa; Charité Universitätsmedizin Berlin, Department of Anesthesiology and Operative Intensive Care Medicine<br/> Paeschke, Nadine; Charité Universitätsmedizin Berlin, Department of Anesthesiology and Operative Intensive Care Medicine<br/> Meisel, Christian; Labor Berlin - Charité Vivantes GmbH, Department of Immunology<br/> Nyvlt, Peter; Charité Universitätsmedizin Berlin, Department of Anesthesiology and Operative Intensive Care Medicine<br/> Schuster, Friederike; Charité Universitätsmedizin Berlin, Department of Anesthesiology and Operative Intensive Care Medicine<br/> Piper, Sophie; Charité Universitätsmedizin Berlin, Institute of Biometry and Clinical Epidemiology<br/> Kruppa, Jochen; Charité - Universitätsmedizin Berlin, corporate member of Freie Universität Berlin, Humboldt-Universität zu Berlin and Berlin Institute of Health, Berlin, Germany , Institute of Biometry and Clinical Epidemiology<br/> Vorderwülbecke, Gerald; Charité Universitätsmedizin Berlin, Department of Anesthesiology and Operative Intensive Care Medicine<br/> Balzer, Felix; Charité Universitätsmedizin Berlin, Department of Anesthesiology and Operative Intensive Care Medicine<br/> La Roseé, Paul; Schwarzwald-Baar Klinikum Villingen-Schwenningen GmbH, Klinik für Innere Medizin II<br/> Schenk, Thomas; Universitätsklinikum Jena, Department of Hematology and Oncology<br/> Unterwalder, Nadine; Labor Berlin - Charité Vivantes GmbH, Department of Immunology<br/> Kölsch, Uwe; Labor Berlin - Charité Vivantes GmbH, Department of Immunology<br/> Lachmann, Nils; Charité Universitätsmedizin Berlin, Institute for Transfusion Medicine, H&amp;I Laboratory<br/> Akyüz, Levent; Charité Universitätsmedizin Berlin, Institute for Medical Immunology<br/> Brunkhorst, Frank; Universitätsklinikum Jena, Center for Clinical Studies, Department of Anesthesiology and Intensive Care Medicine<br/> Volk, Hans-Dieter; Charité Universitätsmedizin Berlin, Institute for</p> |

|                                      |                                                                                                                                                                                                                      |
|--------------------------------------|----------------------------------------------------------------------------------------------------------------------------------------------------------------------------------------------------------------------|
|                                      | Medical Immunology<br>Keh, Didier; Charité Universitätsmedizin Berlin, Department of<br>Anesthesiology and Operative Intensive Care Medicine<br>Spies, Claudia; Charité, Universitätsmedizin Berlin, Anaesthesiology |
| <b>Primary Subject<br/>Heading</b> : | Intensive care                                                                                                                                                                                                       |
| Secondary Subject Heading:           | Diagnostics, Gastroenterology and hepatology, Haematology (incl blood<br>transfusion), Immunology (including allergy), Rheumatology                                                                                  |
| Keywords:                            | Hemophagocytic Lymphohistiocytosis (HLH), Hemophagocytic syndrome<br>(HS), Macrophage activation syndrome (MAS), Sepsis, Biomarker,<br>Intensive Care Unit (ICU)                                                     |
|                                      |                                                                                                                                                                                                                      |

SCHOLARONE™  
Manuscripts

1  
2  
3  
4  
5  
6  
7  
8  
9  
10  
11  
12  
13  
14  
15  
16  
17  
18  
19  
20  
21  
22  
23  
24  
25  
26  
27  
28  
29  
30  
31  
32  
33  
34  
35  
36  
37  
38  
39  
40  
41  
42  
43  
44  
45  
46  
47  
48  
49  
50  
51  
52  
53  
54  
55  
56  
57  
58  
59  
60

# Diagnostic Biomarkers for Adult Hemophagocytic Lymphohistiocytosis in Critically Ill Patients (HEMICU): Prospective Observational Study Protocol

**Gunnar Lachmann<sup>1,2</sup>, Cornelia Knaak<sup>1</sup>, Clarissa von Haefen<sup>1</sup>, Nadine Paeschke<sup>1</sup>,  
Christian Meisel<sup>3</sup>, Peter Nyvlt<sup>1</sup>, Friederike S. Schuster<sup>1</sup>, Sophie K. Piper<sup>2,4</sup>,  
Jochen Kruppa<sup>2,4</sup>, Gerald Vorderwülbecke<sup>1</sup>, Felix Balzer<sup>1</sup>, Paul La Roseé<sup>5</sup>,  
Thomas Schenk<sup>6</sup>, Nadine Unterwalder<sup>3</sup>, Uwe Kölsch<sup>3</sup>, Nils Lachmann<sup>7</sup>, Levent  
Akyüz<sup>8</sup>, Frank M. Brunkhorst<sup>9</sup>, Hans-Dieter Volk<sup>8</sup>, Didier Keh<sup>1</sup>, Claudia Spies<sup>1</sup>**

<sup>1</sup>Department of Anesthesiology and Operative Intensive Care Medicine (CCM, CVK),  
Charité – Universitätsmedizin Berlin, corporate member of Freie Universität Berlin,  
Humboldt-Universität zu Berlin, and Berlin Institute of Health, Augustenburger Platz  
1, D-13353 Berlin, Germany

<sup>2</sup>Berlin Institute of Health (BIH), Anna-Louisa-Karsch-Str. 2, D-10178 Berlin,  
Germany

<sup>3</sup>Department of Immunology, Labor Berlin - Charité Vivantes GmbH, Sylter Strasse 2,  
13353 Berlin

<sup>4</sup>Institute of Biometry and Clinical Epidemiology, Charité – Universitätsmedizin Berlin,  
corporate member of Freie Universität Berlin, Humboldt-Universität zu Berlin, and  
Berlin Institute of Health, Charitéplatz 1, D-10117 Berlin, Germany

<sup>5</sup>Klinik für Innere Medizin II, Schwarzwald-Baar-Klinikum, Klinikstraße 11, D-78052  
Villingen-Schwenningen, Germany

1  
2  
3 <sup>6</sup>Department of Hematology and Oncology, Universitätsklinikum Jena,  
4 Am Klinikum 1, D-07747 Jena, Germany  
5  
6

7 <sup>7</sup>Institute for Transfusion Medicine, H&I Laboratory, Charité – Universitätsmedizin  
8 Berlin, Corporate Member of Freie Universität Berlin, Humboldt-Universität zu Berlin,  
9 and Berlin Institute of Health, Augustenburger Platz 1, D-13353 Berlin, Germany  
10  
11  
12

13 <sup>8</sup>Institute for Medical Immunology, Charité – Universitätsmedizin Berlin, Corporate  
14 Member of Freie Universität Berlin, Humboldt-Universität zu Berlin, and Berlin  
15 Institute of Health, Augustenburger Platz 1, D-13353 Berlin, Germany  
16  
17  
18

19 <sup>9</sup>Center for Clinical Studies, Department of Anesthesiology and Intensive Care  
20 Medicine, Universitätsklinikum Jena, Salvador-Allende-Platz 27, D-07747 Jena,  
21 Germany  
22  
23  
24  
25  
26  
27

28 Corresponding Author:

29 Dr. med. Gunnar Lachmann

30 Department of Anesthesiology and Operative Intensive Care Medicine (CCM, CVK)

31 Charité – Universitätsmedizin Berlin, corporate member of Freie Universität Berlin,

32 Humboldt-Universität zu Berlin, and Berlin Institute of Health

33 Augustenburger Platz 1, D-13353 Berlin, Germany  
34  
35  
36

37 Phone: +49 30 450 551 002

38 Fax: +49 30 450 551 909

39 Email: [gunnar.lachmann@charite.de](mailto:gunnar.lachmann@charite.de)  
40  
41  
42  
43  
44  
45  
46

47 **Word and Element Counts**

48  
49 Abstract: 412

50  
51 Introduction: 553

52  
53 Discussion: 433

54  
55  
56 Figures: 1

57  
58  
59 Tables: 1  
60

## Abstract

*Introduction:* Hemophagocytic Lymphohistiocytosis (HLH) in adults is characterized by toxic immune activation and a sepsis-like syndrome leading to high numbers of undiagnosed cases and mortality rates up to 68%. Early diagnosis and specific immune suppressive treatment is mandatory to avoid fatal outcome, but diagnostic criteria (HLH-2004) are adopted from pediatric HLH, and have not been validated in adults. Experimental studies suggest biomarkers to sufficiently diagnose HLH. However, biomarkers for diagnosis of adult HLH have not been investigated, yet.

*Methods and analysis:* The Diagnostic Biomarkers for Adult Hemophagocytic Lymphohistiocytosis in Critically Ill Patients study (HEMICU) aims to estimate the incidence rate of adult HLH among suspected adult intensive care unit (ICU) patients. Screening for HLH will be performed in 16 ICUs of the Charité – Universitätsmedizin Berlin. Inclusion criteria are bicytopenia, hyperferritinemia ( $\geq 500 \mu\text{g/L}$ ), fever, or when HLH is suspected by the clinicians. Over a period of two years, we expect inclusion of about 100 patients with suspected HLH. HLH will be diagnosed if at least 5 HLH-2004 criteria are fulfilled together with an expert review, all other included patients will serve as controls. Secondly, a panel of potential biomarker candidates will be explored. DNA, plasma and serum will be stored in a biobank. Primary endpoint of the study is the incidence rate of adult HLH among suspected adult patients during ICU stay. Out of a variety of measured biomarkers, this study furthermore aims to find highly potential biomarkers for diagnosis of adult HLH in ICU. Results of this study will contribute to improved recognition and patient outcome of adult HLH in the clinical routine.

*Ethics and dissemination:* The institutional ethics committee approved this study on August 1, 2018 (Ethics committee of the Charité – Universitätsmedizin Berlin,

1  
2  
3 EA4/006/18). Results of the study will be disseminated in an international peer-  
4  
5 reviewed journal and presented at conferences.  
6

7 *Trial registration:* The study was registered with clinicaltrials.gov (NCT03510650) on  
8  
9 April 27, 2018.  
10  
11  
12

13  
14  
15 **Keywords:** Hemophagocytic Lymphohistiocytosis (HLH), Hemophagocytic syndrome  
16  
17 (HS), Macrophage activation syndrome (MAS), sepsis, biomarker, intensive care Unit  
18  
19 (ICU)  
20  
21  
22

#### 23 24 25 **Strengths and Limitations:** 26

27  
28  
29 - The HEMICU study is the first prospective study to investigate biomarkers for  
30  
31 diagnosis of adult HLH in ICU patients.

32  
33 - The variety of analyzed biomarkers will also provide a better understanding of adult  
34  
35 HLH pathophysiology.

36  
37 - Biobanking of DNA, plasma and serum of adult HLH patients will generate a  
38  
39 database to investigate future research questions.

40  
41 - This study might be limited in that it only includes ICU patients and findings will not  
42  
43 be generalizable to non-ICU patients.  
44  
45  
46  
47  
48  
49  
50  
51  
52  
53  
54  
55  
56  
57  
58  
59  
60

## Introduction

Hemophagocytic Lymphohistiocytosis (HLH) is a hyperinflammatory syndrome due to toxic immune activation associated with multiple organ failure and high mortality in intensive care unit (ICU) patients [1-3]. Primary HLH due to genetic causes has been subject of extensive research in pediatric medicine resulting in an advanced understanding of its pathophysiology including identification of underlying genetic defects related to cytotoxic granule exocytosis [4]. However, much less is known about HLH in adults where the secondary form triggered by infections, autoimmune diseases, malignancies or immunosuppressive therapy is more common. Both hereditary primary and reactive secondary HLH are characterized by impaired immune function, i.e. impaired natural-killer (NK) or cytotoxic-T-cell function leading to abnormal activation of cytokine-releasing macrophages and T-cells and finally to an uncontrolled inflammatory condition known as cytokine storm [5].

Currently, diagnosis is based on the HLH-2004 criteria (Table 1) derived from the pediatric HLH-2004 protocol which has not been validated in adult HLH patients [6, 7]. Moreover, diagnosis of HLH in ICU-admitted patients is hampered by its sepsis-like presentation. Clinical features include repetitive fever, hepato- and/or splenomegaly and antibiotic-refractory infections as well as pulmonary and renal involvement with consequent multiple organ failure [7]. Lab findings may reveal cytopenia, hypertriglyceridemia, ferritin  $\geq 500 \mu\text{g/L}$ , and hypofibrinogenemia. Timely diagnosis is crucial to initiate adequate treatment and thus to improve the prognosis. As demonstrated by Jordan et al. [8], early therapy reduces mortality to 30-35%. However, up to 78% of all HLH cases remain undiagnosed leading to mortality rates as high as 68% [2, 9]. Given the lack of specific diagnostic tests and the established use of invalidated diagnostic criteria in adults, we aim to identify a biomarker panel of high sensitivity and specificity to allow early detection of HLH in critically ill patients.



1  
2  
3  
4  
5  
6  
7  
8  
9  
10  
11  
12  
13  
14  
15  
16  
17  
18  
19  
20  
21  
22  
23  
24  
25  
26  
27  
28  
29  
30  
31  
32  
33  
34  
35  
36  
37  
38  
39  
40  
41  
42  
43  
44  
45  
46  
47  
48  
49  
50  
51  
52  
53  
54  
55  
56  
57  
58  
59  
60

For peer review only

## Methods and Analysis

### Design and screening

Over a two-year period (ongoing since 01/09/2018), screening of all patients admitted to 16 adult ICUs of the Charité - Universitätsmedizin Berlin will be performed. As part of the process, electronic patient charts will be screened daily for bicytopenia by an automated script. All patients with bicytopenia are daily searched by the study team for HLH-2004 criteria (Table 1), the HScore [10], and suspected HLH by the clinicians. If the patient is highly suspicious for HLH, patients will be enrolled after informed consent by the patient himself or the legal representative. Immediately after study enrolment and before initiation of specific HLH treatment, whole blood samples will be obtained for all analyses. Additionally, plasma and serum samples as well as DNA will be stored in a biobank (Figure 1). HLH will be diagnosed if at least 5 HLH-2004 criteria are fulfilled and finally be confirmed after a case-by-case review by two HLH experts. The study aims to include at least 100 patients with suspected HLH. Patients in whom HLH is not confirmed will serve as controls.

**Table 1. HLH-2004 diagnostic criteria [6]**

#### **HLH-2004 diagnostic criteria of which at least 5 must be fulfilled**

---

Ferritin  $\geq 500$   $\mu\text{g/L}$

---

Fever ( $\geq 38.2$   $^{\circ}\text{C}$ )

---

Splenomegaly

---

Cytopenias in  $\geq 2$  lines (Hemoglobin  $< 9$  g/dL, platelets  $< 100$  /nL, neutrophils  $< 1.0$  /nL)

---

Hypertriglyceridemia and/or hypofibrinogenemia

(fasting triglycerides  $\geq 265$  mg/dL, fibrinogen  $< 1.5$  g/L)

---

Hemophagocytosis in bone marrow or spleen or lymph nodes

---

1  
2  
3 Low or absent NK activity

4  
5 Soluble CD25 (soluble IL-2 receptor (sIL-2R))  $\geq 2,400$  U/mL  
6  
7  
8

9  
10 Study Population and eligibility criteria for patients  
11  
12

13  
14 Inclusion criteria:

- 15  
16
- 17 • Intensive care patients of at least 18 years old
  - 18 • Suspected or diagnosed HLH: based on HLH-2004 diagnostic criteria  
19 (bicytopenia, hyperferritinemia ( $\geq 500 \mu\text{g/L}$ ), fever) or suspicion by the clinicians  
20  
21  
22  
23
  - 24 • Eligible to informed consent by the patient himself or the legal representative  
25  
26  
27

28  
29 Exclusion criteria:

- 30  
31
- 32 • Participation in an interventional study  
33  
34
  - 35 • Female patients with pregnancy or breastfeeding  
36  
37

38  
39  
40 Setting

41  
42 Participating ICU include anesthesiological, surgical, medical, neurological, and  
43 mixed ICUs. In total, 16 ICUs of the Charité – Universitätsmedizin Berlin will  
44 contribute patients.  
45  
46  
47  
48  
49

50  
51  
52  
53 Objectives and hypotheses

54  
55 This study aims to investigate critically ill patients for adult HLH and estimate its  
56 incidence rate among suspected patients during ICU stay. Secondly, a panel of  
57 various biomarkers candidates from experimental and pediatric studies will be  
58  
59  
60

1  
2  
3 measured to explore diagnostic potential to diagnose HLH in adult ICU-admitted  
4 patients. As a result, HLH might be detected earlier leading to an improved outcome.  
5  
6  
7 Highly sensitive biomarkers may also help to distinguish HLH from sepsis.  
8  
9

### 10 11 12 13 Patient and public involvement

14  
15 Patients or public were not involved in the development of the research question, the  
16 design, the recruitment and the conduct of this study. Results of the immunological  
17 analyses will be sent to the physicians in charge immediately. Patients will be  
18 informed of the global results of the study at their request.  
19  
20  
21  
22  
23  
24  
25

### 26 27 28 Statistical analyses

29  
30 Incidence rate of HLH among suspected adult patient during ICU stay will be  
31 calculated with 95% confidence intervals. Investigation of potential biomarker will be  
32 exploratory. Descriptive statistics between patient groups with confirmed HLH and  
33 controls will incorporate mean and standard deviation or absolute and relative  
34 frequencies depending on each variable's scale. Uni- and multivariable logistic  
35 regression models with confirmed HLH diagnosis as outcome will be calculated for  
36 different combinations of influencing variables and biomarkers. Receiver operator  
37 characteristic (ROC) analysis will be performed to determine discrimination ability as  
38 measured by the area under the curve (AUC) for each continuous biomarker.  
39  
40 Sensitivity and specificity within our patient sample will be given for cut-off points with  
41 highest Youden index. Highly potential markers are found when sensitivity and  
42 specificity each reach 90%.  
43  
44  
45  
46  
47  
48  
49  
50  
51  
52  
53  
54  
55  
56  
57  
58  
59  
60

## Outcome measures

### Primary Endpoint

- Incidence rate of adult HLH among suspected patients during ICU stay

### Secondary Endpoints

- Identification of highly sensitive and highly specific biomarkers to safely diagnose adult HLH in ICU
- Trigger and underlying conditions
- Therapy of HLH by clinicians
- ICU and hospital length of stay
- Mortality and survival after 6 months
- Quality of life questionnaire 36-item short form health survey (SF-36) after 6 months [11]
- Human immunodeficiency virus (HIV) antibodies and -antigen
- Epstein Barr Virus (EBV) and Cytomegalovirus (CMV) viral loads
- Inflammatory markers (ferritin, C-reactive protein (CRP), procalcitonin (PCT), interleukin (IL)-1 $\beta$ , IL-2, IL-6, IL-8, IL-10, IL-18, IL-33, tumor necrosis factor (TNF)- $\alpha$ , interferon (IFN)- $\gamma$ , sCD25, sCD163, presepsin) [12]
- Perforin and CD107a [13]
- Fibrinogen, triglycerides, bilirubin, lactate dehydrogenase (LDH), liver transaminases (ALAT and ASAT)
- Sodium, serum albumin, serum protein electrophoresis
- Detailed immune status (differential blood count, T cells (CD3+), B cells (CD19+), NK cells (CD16+), T helper cells (CD4+), cytotoxic T cells (CD8+), CD4 / CD8 ratio, HLA-DR of CD8+, CD11a of CD8-, CD57 of CD8-, CD28 of CD8+, HLA-DR of monocytes, CD56bright and CD69 of NK cells)
- Glycosylated ferritin [14] and microRNAs (miR-205-5p, miR-194-5p and miR-30c-5p) [15]
- Chemokines CCL2 (MCP-1), CCL3, CCL4, CCL5 (RANTES), CCL11 (Eotaxin), CCL19, CCL20, CXCL1, CXCL9, CXCL8 (IL-8), CXCL10 (IP-10), CXCL12 (SDF1A) [16]
- HLA Typing

- Biobanking for future research questions (e.g. genetic polymorphisms and gene expression of PRF1, UNC13D, STX11, STXBP2 [7])

### Data collection

Number of screened patients, number of patients with suspected HLH who could not be included as well as data on all outcome measures will be collected prospectively.

If the patient received immunosuppressive therapy prior to inclusion, this will be documented separately. Further data including patient demographic data, past medical conditions, physicians' reports and routine laboratory results will be abstracted from the hospital's database. For follow-up six months after study inclusion, patients will be contacted either by telephone or by mail as indicated upon enrolment to assess health-related quality of life and mortality, respectively.

### Immunological measurements

Plasma concentrations of soluble IL-2R (sIL-2R or sCD25) will be determined with the IMMULITE™ semi-automatic chemiluminescent immunoassay (Siemens Healthcare GmbH, Erlangen, Germany). Additional soluble factors IL-1 $\beta$ , IL-2, IL-6, IL-8, IL-10, IL-18, IL-33, TNF- $\alpha$ , IFN- $\gamma$  will be measured by Meso Scale Discovery® (Meso Scale Diagnostics, Maryland USA). The kit provides all reagents, together with a 96-well plate with specific pre-coated spots, the detection antibodies and assay diluent. The standard will be reconstituted with assay diluent to obtain a lot specific concentration which differs for all cytokines. The vials are inverted multiple times for mixing and, after vortexing, the vials will be kept for 5–10 min at RT and then on ice until use. Preparation of further serial 1:5 dilution of Cytokine Standard is performed. Quality Controls (low and high) are components of the kits and respective Quality

1  
2  
3 Control ranges are provided by the manufacturer. The Quality Controls (low and high)  
4  
5 will be reconstituted with 250 µl of deionized water. The vials are inverted multiple  
6  
7 times for mixing and, after vortexing, kept for 5–10 min at RT and then on ice until  
8  
9 use. Plasma concentrations of soluble CD163 protein levels from plasma will be  
10  
11 determined with the Quantikine® ELISA human CD163 Immunoassay (R&D  
12  
13 Systems, Minneapolis, USA). The minimum detectable dose ranged from 0.058-  
14  
15 0.613 ng/mL. For measurement of presepsin, Presepsin (Human) ELISA Kit will be  
16  
17 used (BioVision, California, USA) with a detection range of 0.156-10 ng/mL.  
18  
19  
20  
21

22 Flow cytometric analysis of human lymphocyte subsets in EDTA whole blood will be  
23  
24 performed, as described recently [17]. Briefly, the following mouse anti-human  
25  
26 fluorescently-labelled monoclonal antibodies (mAb) are used for quantification of  
27  
28 lymphocytes subsets and analysis of T and NK cell activation markers: cluster of  
29  
30 differentiation (CD)3 Allophycocyanine-Alexa Fluor 750 (APC-A750), CD4 energy  
31  
32 coupled dye (ECD), CD8 APC, CD11a Fluorescein isothiocyanate (FITC), CD14  
33  
34 FITC, CD16 Phycoerythrine (PE), CD19 PE-Cy5.5, CD28 PC5, CD45 Krome-Orange  
35  
36 (KrO), CD56 PE or CD56 APC, CD57 Pacific Blue (PB), CD69 PE, HLA-DR PE, (all  
37  
38 from Beckman Coulter). Functional analysis of NK cells will be performed using the  
39  
40 CD107a degranulation assay according to a protocol published by Bryceson et al.  
41  
42 [18]. Briefly, peripheral blood mononuclear cells (PBMC) will be isolated by density  
43  
44 gradient centrifugation and incubated overnight in the presence or absence of 3600  
45  
46 IU/mL recombinant interleukin-2 (Peprotech). PBMC will then be incubated with the  
47  
48 target cell line K562 (ATCC) in a 1:1 ratio for 3 hours. Subsequently, CD107a  
49  
50 expression on NK cells is assessed by staining samples with fluorescently-labelled  
51  
52 antibodies against lineage markers (see above) and an anti-CD107a FITC-labelled  
53  
54 mAb (eBioscience). Perforin expression in NK cells will be assessed by intracellular  
55  
56 staining in unstimulated NK cells using the PerFix-nc reagent (Beckman Coulter) for  
57  
58  
59  
60

1  
2  
3 cell permeabilization and an APC-labelled anti-perforin mAb (eBioscience) according  
4  
5 the manufacturer's instructions.  
6  
7

8 Expression of human leukocyte antigen-DR (HLA-DR) on monocytes (mHLA-DR) will  
9  
10 be determined by flow cytometry using a highly standardized quantitative assay, as  
11  
12 described earlier [19]. In short, whole blood in Vacutainer tubes (BD Biosciences,  
13  
14 San Jose, CA, USA) containing EDTA are stained with 20 µl of monoclonal  
15  
16 phycoerythrin-conjugated anti-HLA-DR and PerCP-Cy5.5-conjugated anti-CD14  
17  
18 antibodies (Quantibrite HLA-DR/monocyte™; BD Biosciences) in the dark at room  
19  
20 temperature for 30 min. Erythrocyte lysis will be done with 0.5 mL of lysing solution  
21  
22 (BD Biosciences) for another 30 min at room temperature. Finally, the cells are  
23  
24 washed with 1 mL PBS buffer containing 2% FCS and analyzed on a Navios flow  
25  
26 cytometer (Beckman Coulter, Krefeld, Germany). HLA-DR surface expression on  
27  
28 monocytes will be calculated as monoclonal antibodies bound per cell (mAb/cell)  
29  
30 using the QuntiBRITE™ PE calibration beads. All flow cytometric analyses will be  
31  
32 performed on a ten-color Navios flow cytometer using the Navios Software (Beckman  
33  
34 Coulter). Human glycosylated ferritin will be determined by Enzyme-linked  
35  
36 Immunosorbent Assay (MyBioSource, San Diego, USA). The sensitivity of this kit is  
37  
38 2.0 ng/mL.  
39  
40  
41  
42  
43  
44  
45

46 The expression of miR-205-5p, miR-194-5p and miR-30c-5p will be determined in  
47  
48 whole blood, plasma and serum using a protocol published by Balcells et al. [20].  
49  
50 Briefly, after RNA isolation, miRNAs are polyadenylated and then reverse transcribed  
51  
52 with a special primer (RT-primer). For quantitative real time PCR (qPCR), two  
53  
54 specific primers for each miRNA are designed using a software tool from Busk [21].  
55  
56 All primers are tested for specificity and efficiency. The qPCR will be performed with  
57  
58 SYBR Green using the QuantStudio5® (Thermo Fisher, Darmstadt, Germany). The  
59  
60



1  
2  
3 quantification of chemokines involved in cell trafficking and effector functions of  
4 lymphocytes, granulocytes, and mononuclear cells from the CC subfamily (CCL2,  
5 CCL3, CCL4, CCL5, CCL11, CCL19, and CCL20) as well as the CXC subfamily  
6 (CXCL1, CXCL8 (IL-8), CXCL10, and CXCL12) will be performed with the  
7  
8 LUNARIS™ Human 11-Plex Chemokine Kit (AYOXXA Biosystems GmbH, Cologne,  
9 Germany).

10  
11  
12 Determination of human leukocyte antigen (HLA) typing will be performed by reverse  
13 sequence-specific oligonucleotide (rSSO) assay LABType® (One Lambda, Canoga  
14 Park, CA, USA). Typing will be assessed on an intermediate resolution level for HLA-  
15 A, -B, -C, -DRB1, -DQA1 and -DQB1. The assay will be performed according to the  
16 manufacturer's instructions and data will be acquired on a Luminex® FlexMAP 3D  
17 machine (Luminex, Austin, TX, USA).  
18  
19  
20  
21  
22  
23  
24  
25  
26  
27  
28  
29  
30  
31  
32  
33  
34

### 35 Informed consent in critically ill patients

36  
37 Written informed consent will be obtained from all patients or their legally authorized  
38 representatives. Consent for genetic analyzes in future projects will be obtained  
39 separately.  
40  
41  
42  
43  
44  
45  
46  
47

### 48 Sample size

49  
50 The true incidence of adult HLH in ICU is unknown. According to our own research  
51 [9] and the annual number of patients admitted to our ICU, we expect to see about  
52 200 patients with diagnosed HLH over two years, and about 400 with suspected  
53 HLH. Of these, we hope to include at least 100 patients with suspected HLH into the  
54 study, of whom about 50 patients are expected to be diagnosed with HLH. When the  
55  
56  
57  
58  
59  
60

1  
2  
3 sample size is 100, a two-sided 95.0% confidence interval for a single proportion  
4  
5 using the large sample normal approximation will extend 0.1 from the observed  
6  
7 proportion for an expected proportion of 0.5 (nQuery Advisor 7.0).  
8  
9

## 10 11 12 13 Ethics and Dissemination

14  
15  
16 The institutional ethics committee approved this study on August 1, 2018 (Ethics  
17  
18 committee of the Charité – Universitätsmedizin Berlin, EA4/006/18). The data  
19  
20 protection commissioner also approved the study (91-SP-18), which was registered  
21  
22 with clinicaltrials.gov (NCT03510650) on April 27, 2018. Results of the study will be  
23  
24 disseminated in an international peer-reviewed journal and presented at conferences.  
25  
26  
27  
28  
29

## 30 31 Discussion

32  
33  
34 HLH is a rare condition in adults with poor prognosis. Due to the paucity of data  
35  
36 available on adult HLH, recognition remains low resulting in delayed diagnosis and  
37  
38 treatment and finally, fatal outcome. This is the first prospective study to  
39  
40 systematically investigate routine and non-routine parameters for biomarker  
41  
42 development. Importantly, the daily systematic screening will help to identify HLH  
43  
44 patients at an early stage of the syndrome which ultimately will improve patient care,  
45  
46 patients' safety and outcome. Moreover, describing a distinct pattern of biomarkers  
47  
48 generates new hypothesis for future research thereby potentially providing targets for  
49  
50 therapy development. With regard to clinical practice, the HEMICU study seeks to  
51  
52 inform clinicians about HLH and ICU therapies to improve outcomes for HLH  
53  
54 patients. However, it is of note that this study does not seek to advice the clinician in  
55  
56 charge to change therapy. No change in routine management is intended due to the  
57  
58  
59  
60

1  
2  
3 observational study design and final decisions are left to the discretion of the  
4  
5 responsible clinician.  
6  
7  
8  
9

## 10 11 Strengths and Limitations

12  
13  
14 This study might be limited in that it only includes ICU patients and findings will not  
15  
16 be generalizable to non-ICU patients. In addition, patients might have developed  
17  
18 HLH before ICU admission and will thus be detected and measurements obtained at  
19  
20 an advanced stage of the disease possibly limiting comparability of the results.  
21  
22 Moreover, we will not assess longitudinal parameters preventing us from describing  
23  
24 dynamics of biomarkers over time. However, as this study aims to develop a tool  
25  
26 facilitating diagnosis at the earliest possible time point, study endpoints will not be  
27  
28 affected by lack of repeated measurements. Possible advances of this study include  
29  
30 comprehensive lab testing of parameters, which have previously been suggested to  
31  
32 be associated with HLH [12-16]. Previous studies, most of which are retrospective in  
33  
34 nature, aimed at identifying associations to detect risk factors [2, 22]. Therefore, the  
35  
36 HEMICU study is the first prospective study of its kind.  
37  
38  
39  
40  
41  
42  
43  
44  
45  
46  
47  
48

## 49 Acknowledgements

50 We thank the Department of Cardiovascular Surgery, the Department of Surgery  
51  
52 CCM/CVK, the Medical Department, Division of Nephrology and Internal Intensive  
53  
54 Care Medicine (CVK/CCM), the Medical Department, Division of Infectiology and  
55  
56 Pneumonology, the Medical Department, Division of Cardiology (CVK), the  
57  
58 Department of Cardiology (CBF), the Department of Neurology with Experimental  
59  
60 Neurology, and the Department of Anesthesiology and Operative Intensive Care

1  
2  
3 Medicine (CBF) for being part of our study and excellent collaboration. We also thank  
4  
5 the BIH Biobank Core Facility for support, coordination and storage of blood samples  
6  
7 (biobank). We are grateful to Dr. Kathrin Scholtz for monitoring the study.  
8  
9  
10  
11  
12  
13

## 14 Competing interests

15  
16  
17 The authors declare no conflicts of interest.  
18  
19  
20  
21  
22

## 23 References

- 24  
25  
26  
27  
28  
29 1. Buyse, S., et al., *Critical care management of patients with hemophagocytic lymphohistiocytosis*. Intensive Care Med, 2010. **36**(10): p. 1695-702.
- 30  
31 2. Barba, T., et al., *Hemophagocytic Lymphohistiocytosis in Intensive Care Unit: A 71-Case Strobe-Compliant Retrospective Study*. Medicine (Baltimore), 2015. **94**(51): p. e2318.
- 32  
33 3. Lachmann, G., et al., *[Hemophagocytic lymphohistiocytosis : A diagnostic challenge on the ICU]*. Anaesthetist, 2016. **65**(10): p. 776-786.
- 34  
35 4. Devitt, K., et al., *Hemophagocytic lymphohistiocytosis secondary to T-cell/histiocyte-rich large B-cell lymphoma*. Leuk Res Rep, 2014. **3**(2): p. 42-5.
- 36  
37 5. Filipovich, A.H., *Hemophagocytic lymphohistiocytosis (HLH) and related disorders*. Hematology Am Soc Hematol Educ Program, 2009: p. 127-31.
- 38  
39 6. Henter, J.I., et al., *HLH-2004: Diagnostic and therapeutic guidelines for hemophagocytic lymphohistiocytosis*. Pediatr Blood Cancer, 2007. **48**(2): p. 124-31.
- 40  
41 7. Ramos-Casals, M., et al., *Adult haemophagocytic syndrome*. Lancet, 2014. **383**(9927): p. 1503-1516.
- 42  
43 8. Jordan, M.B., et al., *How I treat hemophagocytic lymphohistiocytosis*. Blood, 2011. **118**(15): p. 4041-52.
- 44  
45 9. Lachmann, G., et al., *Hemophagocytic Lymphohistiocytosis: Potentially Underdiagnosed in Intensive Care Units*. Shock, 2018. **50**(2): p. 149-155.
- 46  
47 10. Fardet, L., et al., *Development and validation of the HScore, a score for the diagnosis of reactive hemophagocytic syndrome*. Arthritis Rheumatol, 2014. **66**(9): p. 2613-20.
- 48  
49 11. Chrispin, P.S., et al., *Short Form 36 in the intensive care unit: assessment of acceptability, reliability and validity of the questionnaire*. Anaesthesia, 1997. **52**(1): p. 15-23.
- 50  
51 12. Put, K., et al., *Cytokines in systemic juvenile idiopathic arthritis and haemophagocytic lymphohistiocytosis: tipping the balance between interleukin-18 and interferon-gamma*. Rheumatology (Oxford), 2015. **54**(8): p. 1507-17.
- 52  
53 13. Rubin, T.S., et al., *Perforin and CD107a testing is superior to NK cell function testing for screening patients for genetic HLH*. Blood, 2017. **129**(22): p. 2993-2999.
- 54  
55 14. Nabergoj, M., et al., *Diagnostic and prognostic value of low percentage of glycosylated ferritin in acquired hemophagocytic lymphohistiocytosis: A single-center study*. Int J Lab Hematol, 2017. **39**(6): p. 620-624.
- 56  
57  
58  
59  
60

15. Bay, A., et al., *Evaluation of the plasma micro RNA expression levels in secondary hemophagocytic lymphohistiocytosis*. *Mediterr J Hematol Infect Dis*, 2013. **5**(1): p. e2013066.
16. Bracaglia, C., et al., *Elevated circulating levels of interferon-gamma and interferon-gamma-induced chemokines characterise patients with macrophage activation syndrome complicating systemic juvenile idiopathic arthritis*. *Ann Rheum Dis*, 2017. **76**(1): p. 166-172.
17. Klehmet, J., et al., *Circulating lymphocyte and T memory subsets in glucocorticosteroid versus IVIG treated patients with CIDP*. *J Neuroimmunol*, 2015. **283**: p. 17-22.
18. Bryceson, Y.T., et al., *A prospective evaluation of degranulation assays in the rapid diagnosis of familial hemophagocytic syndromes*. *Blood*, 2012. **119**(12): p. 2754-63.
19. Docke, W.D., et al., *Monitoring temporary immunodepression by flow cytometric measurement of monocytic HLA-DR expression: a multicenter standardized study*. *Clin Chem*, 2005. **51**(12): p. 2341-7.
20. Balcells, I., S. Cirera, and P.K. Busk, *Specific and sensitive quantitative RT-PCR of miRNAs with DNA primers*. *BMC Biotechnol*, 2011. **11**: p. 70.
21. Busk, P.K., *A tool for design of primers for microRNA-specific quantitative RT-qPCR*. *BMC Bioinformatics*, 2014. **15**: p. 29.
22. Ishii, E., et al., *Nationwide survey of hemophagocytic lymphohistiocytosis in Japan*. *Int J Hematol*, 2007. **86**(1): p. 58-65.

## Funding

Gunnar Lachmann is participant of the BIH Charité Clinician Scientist Program granted by the Charité – Universitätsmedizin Berlin and the Berlin Institute of Health (BIH). The study is supported by the Department of Anesthesiology and Operative Intensive Care Medicine (CCM, CVK), Charité – Universitätsmedizin Berlin.

## Authors' contributions

Study concept: GL. Conceived and designed the experiments: GL, CvH, NP, CM, PL, TS, NL, HDV, DK. Performing the experiments: GL, CK, CvH, NP, CM, PN, FSS, GV, FB, NU, UK, NL, LA. Analyzing the data: GL, CK, PN, FSS, SKP, JK, PL, TS. Wrote the manuscript: GL, CK, CvH, NP, CM, SKP, NL, LA, FMB, DK, CS. Commented on the manuscript: all authors.

## Data statement

Due to legal restrictions imposed by the ethics committee of the Charité – Universitätsmedizin Berlin and the data protection commissioner of the Charité – Universitätsmedizin Berlin, public sharing of study data with other researchers or entities is not allowed. Requests may be sent to [dai-researchdata@charite.de](mailto:dai-researchdata@charite.de).

## Figure legends

Figure 1. Screening protocol and blood sampling.

1  
2  
3  
4  
5  
6  
7  
8  
9  
10  
11  
12  
13  
14  
15  
16  
17  
18  
19  
20  
21  
22  
23  
24  
25  
26  
27  
28  
29  
30  
31  
32  
33  
34  
35  
36  
37  
38  
39  
40  
41  
42  
43  
44  
45  
46  
47  
48  
49  
50  
51  
52  
53  
54  
55  
56  
57  
58  
59  
60



Figure 1 / Screening protocol and blood sampling.

81x60mm (300 x 300 DPI)

# Reporting checklist for protocol of a clinical trial.

Based on the SPIRIT guidelines.

## Instructions to authors

Complete this checklist by entering the page numbers from your manuscript where readers will find each of the items listed below.

Your article may not currently address all the items on the checklist. Please modify your text to include the missing information. If you are certain that an item does not apply, please write "n/a" and provide a short explanation.

Upload your completed checklist as an extra file when you submit to a journal.

In your methods section, say that you used the SPIRIT reporting guidelines, and cite them as:

Chan A-W, Tetzlaff JM, Altman DG, Laupacis A, Gøtzsche PC, Krleža-Jerić K, Hróbjartsson A, Mann H, Dickersin K, Berlin J, Doré C, Parulekar W, Summerskill W, Groves T, Schulz K, Sox H, Rockhold FW, Rennie D, Moher D. SPIRIT 2013 Statement: Defining standard protocol items for clinical trials. *Ann Intern Med.* 2013;158(3):200-207

|                                             |                     | Reporting Item                                                                                               | Page Number |
|---------------------------------------------|---------------------|--------------------------------------------------------------------------------------------------------------|-------------|
| <b>Administrative information</b>           |                     |                                                                                                              |             |
| Title                                       | <a href="#">#1</a>  | Descriptive title identifying the study design, population, interventions, and, if applicable, trial acronym | 1           |
| Trial registration                          | <a href="#">#2a</a> | Trial identifier and registry name. If not yet registered, name of intended registry                         | 14          |
| Trial registration: data set                | <a href="#">#2b</a> | All items from the World Health Organization Trial Registration Data Set                                     | 14          |
| Protocol version                            | <a href="#">#3</a>  | Date and version identifier                                                                                  | 14          |
| Funding                                     | <a href="#">#4</a>  | Sources and types of financial, material, and other support                                                  | 16          |
| Roles and responsibilities: contributorship | <a href="#">#5a</a> | Names, affiliations, and roles of protocol contributors                                                      | 1           |



|    |                           |                     |                                                                      |    |
|----|---------------------------|---------------------|----------------------------------------------------------------------|----|
| 1  | Roles and                 | <a href="#">#5b</a> | Name and contact information for the trial sponsor                   | 16 |
| 2  | responsibilities:         |                     |                                                                      |    |
| 3  | sponsor contact           |                     |                                                                      |    |
| 4  | information               |                     |                                                                      |    |
| 5  |                           |                     |                                                                      |    |
| 6  |                           |                     |                                                                      |    |
| 7  |                           |                     |                                                                      |    |
| 8  | Roles and                 | <a href="#">#5c</a> | Role of study sponsor and funders, if any, in study design;          | 16 |
| 9  | responsibilities:         |                     | collection, management, analysis, and interpretation of data;        |    |
| 10 | sponsor and funder        |                     | writing of the report; and the decision to submit the report for     |    |
| 11 |                           |                     | publication, including whether they will have ultimate authority     |    |
| 12 |                           |                     | over any of these activities                                         |    |
| 13 |                           |                     |                                                                      |    |
| 14 |                           |                     |                                                                      |    |
| 15 |                           |                     |                                                                      |    |
| 16 | Roles and                 | <a href="#">#5d</a> | Composition, roles, and responsibilities of the coordinating centre, | 16 |
| 17 | responsibilities:         |                     | steering committee, endpoint adjudication committee, data            |    |
| 18 | committees                |                     | management team, and other individuals or groups overseeing the      |    |
| 19 |                           |                     | trial, if applicable (see Item 21a for data monitoring committee)    |    |
| 20 |                           |                     |                                                                      |    |
| 21 |                           |                     |                                                                      |    |
| 22 |                           |                     |                                                                      |    |
| 23 | <b>Introduction</b>       |                     |                                                                      |    |
| 24 |                           |                     |                                                                      |    |
| 25 | Background and            | <a href="#">#6a</a> | Description of research question and justification for undertaking   | 5  |
| 26 | rationale                 |                     | the trial, including summary of relevant studies (published and      |    |
| 27 |                           |                     | unpublished) examining benefits and harms for each intervention      |    |
| 28 |                           |                     |                                                                      |    |
| 29 |                           |                     |                                                                      |    |
| 30 | Background and            | <a href="#">#6b</a> | Explanation for choice of comparators                                | 5  |
| 31 | rationale: choice of      |                     |                                                                      |    |
| 32 | comparators               |                     |                                                                      |    |
| 33 |                           |                     |                                                                      |    |
| 34 |                           |                     |                                                                      |    |
| 35 |                           |                     |                                                                      |    |
| 36 | Objectives                | <a href="#">#7</a>  | Specific objectives or hypotheses                                    | 5  |
| 37 |                           |                     |                                                                      |    |
| 38 | Trial design              | <a href="#">#8</a>  | Description of trial design including type of trial (eg, parallel    | 7  |
| 39 |                           |                     | group, crossover, factorial, single group), allocation ratio, and    |    |
| 40 |                           |                     | framework (eg, superiority, equivalence, non-inferiority,            |    |
| 41 |                           |                     | exploratory)                                                         |    |
| 42 |                           |                     |                                                                      |    |
| 43 |                           |                     |                                                                      |    |
| 44 |                           |                     |                                                                      |    |
| 45 | <b>Methods:</b>           |                     |                                                                      |    |
| 46 | <b>Participants,</b>      |                     |                                                                      |    |
| 47 | <b>interventions, and</b> |                     |                                                                      |    |
| 48 | <b>outcomes</b>           |                     |                                                                      |    |
| 49 |                           |                     |                                                                      |    |
| 50 |                           |                     |                                                                      |    |
| 51 | Study setting             | <a href="#">#9</a>  | Description of study settings (eg, community clinic, academic        | 7  |
| 52 |                           |                     | hospital) and list of countries where data will be collected.        |    |
| 53 |                           |                     | Reference to where list of study sites can be obtained               |    |
| 54 |                           |                     |                                                                      |    |
| 55 |                           |                     |                                                                      |    |
| 56 |                           |                     |                                                                      |    |
| 57 | Eligibility criteria      | <a href="#">#10</a> | Inclusion and exclusion criteria for participants. If applicable,    | 8  |
| 58 |                           |                     | eligibility criteria for study centres and individuals who will      |    |
| 59 |                           |                     |                                                                      |    |
| 60 |                           |                     |                                                                      |    |

perform the interventions (eg, surgeons, psychotherapists)

|    |                      |                      |                                                                       |
|----|----------------------|----------------------|-----------------------------------------------------------------------|
| 1  |                      |                      |                                                                       |
| 2  |                      |                      |                                                                       |
| 3  | Interventions:       | <a href="#">#11a</a> | Interventions for each group with sufficient detail to allow          |
| 4  | description          |                      | replication, including how and when they will be administered         |
| 5  |                      |                      |                                                                       |
| 6  | Interventions:       | <a href="#">#11b</a> | Criteria for discontinuing or modifying allocated interventions for a |
| 7  | modifications        |                      | given trial participant (eg, drug dose change in response to harms,   |
| 8  |                      |                      | participant request, or improving / worsening disease)                |
| 9  |                      |                      |                                                                       |
| 10 |                      |                      |                                                                       |
| 11 | Interventions:       | <a href="#">#11c</a> | Strategies to improve adherence to intervention protocols, and any    |
| 12 | adherence            |                      | procedures for monitoring adherence (eg, drug tablet return;          |
| 13 |                      |                      | laboratory tests)                                                     |
| 14 |                      |                      |                                                                       |
| 15 |                      |                      |                                                                       |
| 16 | Interventions:       | <a href="#">#11d</a> | Relevant concomitant care and interventions that are permitted or     |
| 17 | concomitant care     |                      | prohibited during the trial                                           |
| 18 |                      |                      |                                                                       |
| 19 |                      |                      |                                                                       |
| 20 |                      |                      |                                                                       |
| 21 | Outcomes             | <a href="#">#12</a>  | Primary, secondary, and other outcomes, including the specific        |
| 22 |                      |                      | measurement variable (eg, systolic blood pressure), analysis metric   |
| 23 |                      |                      | (eg, change from baseline, final value, time to event), method of     |
| 24 |                      |                      | aggregation (eg, median, proportion), and time point for each         |
| 25 |                      |                      | outcome. Explanation of the clinical relevance of chosen efficacy     |
| 26 |                      |                      | and harm outcomes is strongly recommended                             |
| 27 |                      |                      |                                                                       |
| 28 |                      |                      |                                                                       |
| 29 |                      |                      |                                                                       |
| 30 | Participant timeline | <a href="#">#13</a>  | Time schedule of enrolment, interventions (including any run-ins      |
| 31 |                      |                      | and washouts), assessments, and visits for participants. A            |
| 32 |                      |                      | schematic diagram is highly recommended (see Figure)                  |
| 33 |                      |                      |                                                                       |
| 34 |                      |                      |                                                                       |
| 35 |                      |                      |                                                                       |
| 36 | Sample size          | <a href="#">#14</a>  | Estimated number of participants needed to achieve study              |
| 37 |                      |                      | objectives and how it was determined, including clinical and          |
| 38 |                      |                      | statistical assumptions supporting any sample size calculations       |
| 39 |                      |                      |                                                                       |
| 40 |                      |                      |                                                                       |
| 41 | Recruitment          | <a href="#">#15</a>  | Strategies for achieving adequate participant enrolment to reach      |
| 42 |                      |                      | target sample size                                                    |
| 43 |                      |                      |                                                                       |
| 44 |                      |                      |                                                                       |

## Methods: Assignment of interventions (for controlled trials)

|    |                      |                      |                                                                      |
|----|----------------------|----------------------|----------------------------------------------------------------------|
| 45 |                      |                      |                                                                      |
| 46 |                      |                      |                                                                      |
| 47 |                      |                      |                                                                      |
| 48 |                      |                      |                                                                      |
| 49 |                      |                      |                                                                      |
| 50 | Allocation: sequence | <a href="#">#16a</a> | Method of generating the allocation sequence (eg, computer-          |
| 51 | generation           |                      | generated random numbers), and list of any factors for               |
| 52 |                      |                      | stratification. To reduce predictability of a random sequence,       |
| 53 |                      |                      | details of any planned restriction (eg, blocking) should be provided |
| 54 |                      |                      | in a separate document that is unavailable to those who enrol        |
| 55 |                      |                      | participants or assign interventions                                 |
| 56 |                      |                      |                                                                      |
| 57 |                      |                      |                                                                      |
| 58 |                      |                      |                                                                      |
| 59 |                      |                      |                                                                      |
| 60 |                      |                      |                                                                      |

|    |                        |                      |                                                                       |   |
|----|------------------------|----------------------|-----------------------------------------------------------------------|---|
| 1  | Allocation concealment | <a href="#">#16b</a> | Mechanism of implementing the allocation sequence (eg, central        | 7 |
| 2  | mechanism              |                      | telephone; sequentially numbered, opaque, sealed envelopes),          |   |
| 3  |                        |                      | describing any steps to conceal the sequence until interventions are  |   |
| 4  |                        |                      | assigned                                                              |   |
| 5  |                        |                      |                                                                       |   |
| 6  |                        |                      |                                                                       |   |
| 7  |                        |                      |                                                                       |   |
| 8  | Allocation:            | <a href="#">#16c</a> | Who will generate the allocation sequence, who will enrol             | 7 |
| 9  | implementation         |                      | participants, and who will assign participants to interventions       |   |
| 10 |                        |                      |                                                                       |   |
| 11 | Blinding (masking)     | <a href="#">#17a</a> | Who will be blinded after assignment to interventions (eg, trial      | 7 |
| 12 |                        |                      | participants, care providers, outcome assessors, data analysts), and  |   |
| 13 |                        |                      | how                                                                   |   |
| 14 |                        |                      |                                                                       |   |
| 15 |                        |                      |                                                                       |   |
| 16 |                        |                      |                                                                       |   |
| 17 | Blinding (masking):    | <a href="#">#17b</a> | If blinded, circumstances under which unblinding is permissible,      | 7 |
| 18 | emergency unblinding   |                      | and procedure for revealing a participant's allocated intervention    |   |
| 19 |                        |                      | during the trial                                                      |   |
| 20 |                        |                      |                                                                       |   |
| 21 |                        |                      |                                                                       |   |
| 22 | <b>Methods: Data</b>   |                      |                                                                       |   |
| 23 | <b>collection,</b>     |                      |                                                                       |   |
| 24 | <b>management, and</b> |                      |                                                                       |   |
| 25 | <b>analysis</b>        |                      |                                                                       |   |
| 26 |                        |                      |                                                                       |   |
| 27 |                        |                      |                                                                       |   |
| 28 |                        |                      |                                                                       |   |
| 29 | Data collection plan   | <a href="#">#18a</a> | Plans for assessment and collection of outcome, baseline, and other   | 7 |
| 30 |                        |                      | trial data, including any related processes to promote data quality   |   |
| 31 |                        |                      | (eg, duplicate measurements, training of assessors) and a             |   |
| 32 |                        |                      | description of study instruments (eg, questionnaires, laboratory      |   |
| 33 |                        |                      | tests) along with their reliability and validity, if known. Reference |   |
| 34 |                        |                      | to where data collection forms can be found, if not in the protocol   |   |
| 35 |                        |                      |                                                                       |   |
| 36 |                        |                      |                                                                       |   |
| 37 |                        |                      |                                                                       |   |
| 38 |                        |                      |                                                                       |   |
| 39 | Data collection plan:  | <a href="#">#18b</a> | Plans to promote participant retention and complete follow-up,        | 7 |
| 40 | retention              |                      | including list of any outcome data to be collected for participants   |   |
| 41 |                        |                      | who discontinue or deviate from intervention protocols                |   |
| 42 |                        |                      |                                                                       |   |
| 43 |                        |                      |                                                                       |   |
| 44 | Data management        | <a href="#">#19</a>  | Plans for data entry, coding, security, and storage, including any    | 7 |
| 45 |                        |                      | related processes to promote data quality (eg, double data entry;     |   |
| 46 |                        |                      | range checks for data values). Reference to where details of data     |   |
| 47 |                        |                      | management procedures can be found, if not in the protocol            |   |
| 48 |                        |                      |                                                                       |   |
| 49 |                        |                      |                                                                       |   |
| 50 |                        |                      |                                                                       |   |
| 51 | Statistics: outcomes   | <a href="#">#20a</a> | Statistical methods for analysing primary and secondary outcomes.     | 9 |
| 52 |                        |                      | Reference to where other details of the statistical analysis plan can |   |
| 53 |                        |                      | be found, if not in the protocol                                      |   |
| 54 |                        |                      |                                                                       |   |
| 55 |                        |                      |                                                                       |   |
| 56 | Statistics: additional | <a href="#">#20b</a> | Methods for any additional analyses (eg, subgroup and adjusted        | 9 |
| 57 | analyses               |                      | analyses)                                                             |   |
| 58 |                        |                      |                                                                       |   |
| 59 |                        |                      |                                                                       |   |
| 60 |                        |                      |                                                                       |   |

|    |                            |                      |                                                                         |    |
|----|----------------------------|----------------------|-------------------------------------------------------------------------|----|
| 1  | Statistics: analysis       | <a href="#">#20c</a> | Definition of analysis population relating to protocol non-             | 9  |
| 2  | population and missing     |                      | adherence (eg, as randomised analysis), and any statistical methods     |    |
| 3  | data                       |                      | to handle missing data (eg, multiple imputation)                        |    |
| 4  |                            |                      |                                                                         |    |
| 5  |                            |                      |                                                                         |    |
| 6  | <b>Methods: Monitoring</b> |                      |                                                                         |    |
| 7  |                            |                      |                                                                         |    |
| 8  | Data monitoring:           | <a href="#">#21a</a> | Composition of data monitoring committee (DMC); summary of its          | 7  |
| 9  | formal committee           |                      | role and reporting structure; statement of whether it is independent    |    |
| 10 |                            |                      | from the sponsor and competing interests; and reference to where        |    |
| 11 |                            |                      | further details about its charter can be found, if not in the protocol. |    |
| 12 |                            |                      | Alternatively, an explanation of why a DMC is not needed                |    |
| 13 |                            |                      |                                                                         |    |
| 14 |                            |                      |                                                                         |    |
| 15 |                            |                      |                                                                         |    |
| 16 |                            |                      |                                                                         |    |
| 17 | Data monitoring:           | <a href="#">#21b</a> | Description of any interim analyses and stopping guidelines,            | 7  |
| 18 | interim analysis           |                      | including who will have access to these interim results and make        |    |
| 19 |                            |                      | the final decision to terminate the trial                               |    |
| 20 |                            |                      |                                                                         |    |
| 21 |                            |                      |                                                                         |    |
| 22 | Harms                      | <a href="#">#22</a>  | Plans for collecting, assessing, reporting, and managing solicited      | 7  |
| 23 |                            |                      | and spontaneously reported adverse events and other unintended          |    |
| 24 |                            |                      | effects of trial interventions or trial conduct                         |    |
| 25 |                            |                      |                                                                         |    |
| 26 |                            |                      |                                                                         |    |
| 27 |                            |                      |                                                                         |    |
| 28 | Auditing                   | <a href="#">#23</a>  | Frequency and procedures for auditing trial conduct, if any, and        | 7  |
| 29 |                            |                      | whether the process will be independent from investigators and the      |    |
| 30 |                            |                      | sponsor                                                                 |    |
| 31 |                            |                      |                                                                         |    |
| 32 |                            |                      |                                                                         |    |
| 33 | <b>Ethics and</b>          |                      |                                                                         |    |
| 34 | <b>dissemination</b>       |                      |                                                                         |    |
| 35 |                            |                      |                                                                         |    |
| 36 |                            |                      |                                                                         |    |
| 37 | Research ethics            | <a href="#">#24</a>  | Plans for seeking research ethics committee / institutional review      | 14 |
| 38 | approval                   |                      | board (REC / IRB) approval                                              |    |
| 39 |                            |                      |                                                                         |    |
| 40 |                            |                      |                                                                         |    |
| 41 | Protocol amendments        | <a href="#">#25</a>  | Plans for communicating important protocol modifications (eg,           | 14 |
| 42 |                            |                      | changes to eligibility criteria, outcomes, analyses) to relevant        |    |
| 43 |                            |                      | parties (eg, investigators, REC / IRBs, trial participants, trial       |    |
| 44 |                            |                      | registries, journals, regulators)                                       |    |
| 45 |                            |                      |                                                                         |    |
| 46 |                            |                      |                                                                         |    |
| 47 | Consent or assent          | <a href="#">#26a</a> | Who will obtain informed consent or assent from potential trial         | 14 |
| 48 |                            |                      | participants or authorised surrogates, and how (see Item 32)            |    |
| 49 |                            |                      |                                                                         |    |
| 50 |                            |                      |                                                                         |    |
| 51 | Consent or assent:         | <a href="#">#26b</a> | Additional consent provisions for collection and use of participant     | 14 |
| 52 | ancillary studies          |                      | data and biological specimens in ancillary studies, if applicable       |    |
| 53 |                            |                      |                                                                         |    |
| 54 |                            |                      |                                                                         |    |
| 55 | Confidentiality            | <a href="#">#27</a>  | How personal information about potential and enrolled participants      | 14 |
| 56 |                            |                      | will be collected, shared, and maintained in order to protect           |    |
| 57 |                            |                      | confidentiality before, during, and after the trial                     |    |
| 58 |                            |                      |                                                                         |    |
| 59 |                            |                      |                                                                         |    |
| 60 |                            |                      |                                                                         |    |

|    |                                             |                      |                                                                                                                                                                                                                                                                                     |    |
|----|---------------------------------------------|----------------------|-------------------------------------------------------------------------------------------------------------------------------------------------------------------------------------------------------------------------------------------------------------------------------------|----|
| 1  | Declaration of interests                    | <a href="#">#28</a>  | Financial and other competing interests for principal investigators for the overall trial and each study site                                                                                                                                                                       | 14 |
| 2  |                                             |                      |                                                                                                                                                                                                                                                                                     |    |
| 3  |                                             |                      |                                                                                                                                                                                                                                                                                     |    |
| 4  |                                             |                      |                                                                                                                                                                                                                                                                                     |    |
| 5  | Data access                                 | <a href="#">#29</a>  | Statement of who will have access to the final trial dataset, and disclosure of contractual agreements that limit such access for investigators                                                                                                                                     | 14 |
| 6  |                                             |                      |                                                                                                                                                                                                                                                                                     |    |
| 7  |                                             |                      |                                                                                                                                                                                                                                                                                     |    |
| 8  |                                             |                      |                                                                                                                                                                                                                                                                                     |    |
| 9  |                                             |                      |                                                                                                                                                                                                                                                                                     |    |
| 10 | Ancillary and post trial care               | <a href="#">#30</a>  | Provisions, if any, for ancillary and post-trial care, and for compensation to those who suffer harm from trial participation                                                                                                                                                       | 14 |
| 11 |                                             |                      |                                                                                                                                                                                                                                                                                     |    |
| 12 |                                             |                      |                                                                                                                                                                                                                                                                                     |    |
| 13 |                                             |                      |                                                                                                                                                                                                                                                                                     |    |
| 14 | Dissemination policy: trial results         | <a href="#">#31a</a> | Plans for investigators and sponsor to communicate trial results to participants, healthcare professionals, the public, and other relevant groups (eg, via publication, reporting in results databases, or other data sharing arrangements), including any publication restrictions | 14 |
| 15 |                                             |                      |                                                                                                                                                                                                                                                                                     |    |
| 16 |                                             |                      |                                                                                                                                                                                                                                                                                     |    |
| 17 |                                             |                      |                                                                                                                                                                                                                                                                                     |    |
| 18 |                                             |                      |                                                                                                                                                                                                                                                                                     |    |
| 19 |                                             |                      |                                                                                                                                                                                                                                                                                     |    |
| 20 |                                             |                      |                                                                                                                                                                                                                                                                                     |    |
| 21 | Dissemination policy: authorship            | <a href="#">#31b</a> | Authorship eligibility guidelines and any intended use of professional writers                                                                                                                                                                                                      | 14 |
| 22 |                                             |                      |                                                                                                                                                                                                                                                                                     |    |
| 23 |                                             |                      |                                                                                                                                                                                                                                                                                     |    |
| 24 | Dissemination policy: reproducible research | <a href="#">#31c</a> | Plans, if any, for granting public access to the full protocol, participant-level dataset, and statistical code                                                                                                                                                                     | 14 |
| 25 |                                             |                      |                                                                                                                                                                                                                                                                                     |    |
| 26 |                                             |                      |                                                                                                                                                                                                                                                                                     |    |
| 27 |                                             |                      |                                                                                                                                                                                                                                                                                     |    |
| 28 | <b>Appendices</b>                           |                      |                                                                                                                                                                                                                                                                                     |    |
| 29 |                                             |                      |                                                                                                                                                                                                                                                                                     |    |
| 30 |                                             |                      |                                                                                                                                                                                                                                                                                     |    |
| 31 | Informed consent materials                  | <a href="#">#32</a>  | Model consent form and other related documentation given to participants and authorised surrogates                                                                                                                                                                                  | 14 |
| 32 |                                             |                      |                                                                                                                                                                                                                                                                                     |    |
| 33 |                                             |                      |                                                                                                                                                                                                                                                                                     |    |
| 34 | Biological specimens                        | <a href="#">#33</a>  | Plans for collection, laboratory evaluation, and storage of biological specimens for genetic or molecular analysis in the current trial and for future use in ancillary studies, if applicable                                                                                      | 14 |
| 35 |                                             |                      |                                                                                                                                                                                                                                                                                     |    |
| 36 |                                             |                      |                                                                                                                                                                                                                                                                                     |    |
| 37 |                                             |                      |                                                                                                                                                                                                                                                                                     |    |
| 38 |                                             |                      |                                                                                                                                                                                                                                                                                     |    |
| 39 |                                             |                      |                                                                                                                                                                                                                                                                                     |    |

40 The SPIRIT checklist is distributed under the terms of the Creative Commons Attribution License CC-BY-ND  
 41 3.0. This checklist was completed on 30. June 2019 using <https://www.goodreports.org/>, a tool made by the  
 42 [EQUATOR Network](#) in collaboration with [Penelope.ai](#)  
 43  
 44  
 45  
 46  
 47  
 48  
 49  
 50  
 51  
 52  
 53  
 54  
 55  
 56  
 57  
 58  
 59  
 60
